1 **Associations of plasma omega-6 and omega-3 fatty acids with overall**  
2 **and 19 site-specific cancers: a population-based cohort study in UK**  
3 **Biobank**  
4

5 Authors: Yuchen Zhang, MSPH<sup>1</sup>; Yitang Sun, MPH<sup>2</sup>; Suhang Song, PhD<sup>3</sup>, Nikhil K. Khankari  
6 PhD, MPH<sup>4,5</sup>, J. Thomas Brenna, PhD<sup>6,7</sup>; Ye Shen, PhD<sup>1\*</sup>; Kaixiong Ye, PhD<sup>2,8\*</sup>  
7

8 **Author Affiliations:**

9 <sup>1</sup> Department of Epidemiology and Biostatistics, College of Public Health, University of Georgia,  
10 Athens, Georgia, US

11 <sup>2</sup> Department of Genetics, University of Georgia, Athens, Georgia, US

12 <sup>3</sup> Department of Health Policy and Management, College of Public Health, University of Georgia,  
13 Athens, Georgia, US

14 <sup>4</sup> Division of Genetic Medicine, Vanderbilt University Medical Center, Nashville, Tennessee, US

15 <sup>5</sup> Vanderbilt Genetics Institute, Vanderbilt University Medical Center, Nashville, Tennessee, US

16 <sup>6</sup> Division of Nutritional Sciences, Cornell University, Ithaca, NY, US

17 <sup>7</sup> Dell Pediatric Research Institute and the Depts of Pediatrics, of Nutrition, and of Chemistry,  
18 University of Texas at Austin, Austin, TX, US

19 <sup>8</sup> Institute of Bioinformatics, University of Georgia, Athens, Georgia, US

20 \* YS and KY jointly supervised this project.  
21

22 **Corresponding Authors:**

23 Kaixiong Ye, PhD

24 Department of Genetics, C220 Davison Life Sciences Complex, University of Georgia, 120 East  
25 Green Street, Athens, GA 30602

26 Phone: 706-542-5898 Email: [kaixiong.ye@uga.edu](mailto:kaixiong.ye@uga.edu)  
27

28 Ye Shen, PhD

29 Department of Epidemiology and Biostatistics, University of Georgia, 101 Buck Rd, Athens, GA  
30 30602

31 Phone: 706-542-2754 Email: [yeshen@uga.edu](mailto:yeshen@uga.edu)

32  
33  
34  
35  
36  
37  
38  
39  
40  
41  
42  
43  
44  
45  
46  
47  
48  
49  
50  
51  
52  
53  
54

## Abstract

### Background

Previous epidemiological studies of the associations between polyunsaturated fatty acids (PUFAs) and cancer incidence have been inconsistent. We investigated the associations of plasma omega-3 and omega-6 PUFAs with the incidence of overall and 19 site-specific cancers in a large prospective cohort.

### Methods

253,138 eligible UK Biobank participants were included in our study. With a mean follow-up of 12.9 years, 29,838 participants were diagnosed with cancer. The plasma levels of omega-3 and omega-6 PUFAs were expressed as percentages of total fatty acids (omega-3% and omega-6%).

### Results

In our main models, both omega-6% and omega-3% were inversely associated with overall cancer incidence (HR per SD = 0.98, 95% CI = 0.96-0.99; HR per SD = 0.99, 95% CI = 0.97-1.00; respectively). Of the 19 site-specific cancers available, 14 were associated with omega-6% and five with omega-3%, all indicating inverse associations, with the exception that prostate cancer was positively associated with omega-3% (HR per SD = 1.03, 95% CI = 1.01 - 1.05).

### Conclusions

Our population-based cohort study in UK Biobank indicates small inverse associations of plasma omega-6 and omega-3 PUFAs with the incidence of overall and most site-specific cancers, although there are notable exceptions, such as prostate cancer.

### Keywords

Polyunsaturated fatty acids, Omega-6 fatty acids, Omega-3 fatty acids, Cancer incidence, Prospective cohort study

## 55 **Background**

56 Cancer is a leading cause of morbidity and mortality worldwide, with an estimated 18.1 million  
57 cancer cases globally in 2020. Breast, lung, and colorectal cancer account for over 30% of the  
58 total annual incidence [1]. Polyunsaturated fatty acids (PUFAs) have been postulated to influence  
59 cancer incidence and survival [2-4]. Potential mechanisms of PUFAs in cancer etiology include  
60 serving as precursors to lipid mediators regulating metabolic pathways and inflammatory  
61 responses [5], and altering membrane composition that could affect cell signaling pathways [6].

62  
63 Despite extensive interest and research, the links between PUFAs and cancer remain  
64 inconclusive. An umbrella review of meta-analyses of observational studies of cancer incidence  
65 concluded that there was no convincing evidence regarding the effects of omega-3 PUFAs on the  
66 risk of any cancer, and that there was only weak evidence supporting inverse associations of  
67 omega-3 intake with liver, breast, and brain cancers [3]. A meta-analysis of observational studies  
68 of cancer survival found that the intake of fish or marine omega-3 PUFAs, but not total omega-3  
69 PUFAs, was associated with lower mortality in cancer patients [7]. A meta-analysis of  
70 randomized trials showed that increasing marine omega-3 PUFAs had little or no effects on  
71 overall cancer diagnosis or cancer death, while the effects of increasing omega-6 PUFAs were  
72 unclear because the evidence was of very low quality [2]. These systemic reviews showcase the  
73 limitations of existing studies, which include large between-study heterogeneity, small study bias,  
74 insufficient case numbers, and short follow-up time. Moreover, most studies relied on self-  
75 reported fish oil supplementation or estimated dietary intake, which may suffer from recall errors,  
76 outdated food databases, and measurement inaccuracy [8]. Circulating biomarkers provide more  
77 objective measures of omega-3 and omega-6 PUFA status and are reflective of dietary intakes [9].  
78 Indeed, a meta-analysis of prospective studies found that the blood level of omega-6 PUFAs, but  
79 not their intake, was inversely associated with overall cancer risk [10]. Similarly, another meta-  
80 analysis showed that the blood level of omega-3 PUFAs, but not their intake, was associated with  
81 a lower colorectal cancer risk [11]. Addressing the limitations of current studies and examining  
82 objective blood levels of PUFAs may offer clarity into the roles of omega-3 and omega-6 PUFAs  
83 in cancer risk.

84

85 UK Biobank is a large population-based prospective cohort that has followed over 500,000  
86 participants since 2006 [12]. It is a large homogeneous cohort with a long follow-up time,  
87 offering an unprecedented opportunity to examine the effects of PUFAs on overall cancer and a  
88 comprehensive range of site-specific cancers. A few early studies have revealed that fish oil  
89 supplementation or dietary omega-3 PUFA intake was associated with lower incidence of colon  
90 cancer, lung cancer, or liver cancer [13-15]. Recently, UK Biobank obtained metabolomic  
91 measurements of baseline plasma samples for about 60% of the participants, a random subset of  
92 the full cohort [16]. Leveraging this valuable dataset, we previously showed that circulating  
93 levels of omega-3 and omega-6 PUFAs were both inversely associated with overall cancer  
94 mortality [17]. In this study, we aim to examine the associations of circulating omega-3 and  
95 omega-6 PUFAs, as well as their ratio (i.e., omega-6/omega-3), with the incidence of overall and  
96 19 site-specific cancers in UK Biobank.

97

## 98 **Methods**

### 99 *Study population*

100 Between 2006 and 2010, UK Biobank recruited over half a million participants, aged 37-73, in  
101 22 assessment centers across England, Wales and Scotland. During the baseline assessment visit,  
102 a wide variety of sociodemographic, lifestyle, and health-related data were acquired through self-  
103 administered touch-screen questionnaires, concise computer-assisted interviews, and physical  
104 and functional measures. Blood, urine, and saliva samples were also collected. Of the 502,366  
105 participants, those who had cancer diagnoses at baseline (n=37,737, excluding nonmelanoma  
106 skin cancer with an ICD-10 code of C44), those who had withdrawn from UK Biobank  
107 (n=1,227), and those with missing data on the plasma polyunsaturated fatty acids (n=210,264)  
108 were excluded from our study. A total of 253,138 eligible participants were eventually included.

### 109 *Ascertainment of exposures*

110 The absolute concentrations of plasma polyunsaturated fatty acids (PUFAs) were assessed using  
111 nuclear magnetic resonance (NMR) in plasma samples obtained at the baseline visit from 2007 to  
112 2010, and the corresponding percentages of total fatty acids were calculated [12, 16]. The  
113 omega-3 fatty acids to total fatty acids percentage (omega-3%) and the omega-6 fatty acids to

114 total fatty acids percentage (omega-6%) were the primary exposures of interest in this study. In  
115 addition, we conducted analyses on the ratio of plasma omega-6/omega-3 PUFAs,  
116 docosahexaenoic acid to total fatty acids percentage (DHA%), and linoleic acid to total fatty  
117 acids percentage (LA%). No other individual PUFAs, except DHA and LA, were measured by  
118 the NMR metabolomic platform.

### 119 *Ascertainment of outcomes*

120 The primary outcomes were the first incidence of overall and 19 site-specific cancers based on  
121 diagnostic records in cancer registers ascertained from National Health Service (NHS) central  
122 registers [12]. At the time of our analysis (15 August 2023), we had access to the most current  
123 health outcomes dataset (Version: July 2023), which contained cancer incidence records up to 19  
124 December 2022. Consequently, follow-up time was calculated from the recruitment date until the  
125 aforementioned date, any cancer diagnosis or death, whichever came first. The incidence of  
126 cancer was coded according to the World Health Organization's International Statistical  
127 Classification of Diseases (ICD)-9 or ICD-10 codes. Participants who had cancer at baseline  
128 (excluding nonmelanoma skin cancer) were excluded. ICD-9 codes were only used for pre-  
129 existing cancer and thus excluded. New cancer incidence was defined based on ICD-10 codes  
130 for overall cancer (C00-C97, excluding nonmelanoma skin cancer, C44) and the following 19  
131 site-specific cancers: head and neck (C00-C14), esophagus (C15), stomach (C16), colon (C18),  
132 rectum (C19-C20), hepatobiliary tract (C22-C24), pancreas (C25), lung (C33-C34), malignant  
133 melanoma (C43), connective soft tissue (C49), breast (C50), uterus (C54-C55), ovary (C56),  
134 prostate (C61), kidney (C64-C65), bladder (C66-C67), brain (C70-C72), thyroid (C73), and  
135 lymphoid and hematopoietic tissues (C81-C96).

### 136 *Covariates*

137 The initial questionnaire covered a comprehensive range of potential confounding factors:  
138 demographic characteristics (e.g., age, gender, ethnicity); socioeconomic status, as measured by  
139 the Townsend Deprivation Index (TDI); lifestyle behaviors (e.g., alcohol consumption, smoking  
140 status, body mass index (BMI), and physical activity); and history or family history of diseases  
141 (e.g., diabetes, gastroesophageal reflux disease and family history of cancer). Body mass index  
142 (BMI) was calculated from weight and height expressed in  $\text{kg/m}^2$ . Waist circumference and hip  
143 circumference were recorded at a central registry, and we calculated the corresponding waist-hip

144 ratio (waist circumference divided by hip circumference). The TDI, employed as a measure of  
145 socioeconomic deprivation, was directly obtained from the UK Biobank database, with a higher  
146 score indicating a higher level of socioeconomic deprivation.

### 147 *Statistical analyses*

148 We began by summarizing and comparing participant characteristics based on the quintiles of the  
149 plasma omega-6% and omega-3% at baseline using descriptive statistics. To assess the  
150 differences in demographic features across these quintiles, we employed Pearson's Chi-squared  
151 test for categorical variables and the ANOVA test for continuous variables.

152  
153 To explore the associations with cancer incidence for plasma omega-6%, omega-3%, and their  
154 ratio, we utilized multivariable Cox proportional hazards regression models to estimate hazard  
155 ratios (HRs) along with their corresponding 95% confidence intervals (CIs). We developed three  
156 distinct models, namely, the simply adjusted model, the main model, and the additionally  
157 adjusted model. Within the simply adjusted model, age and sex were designed as stratification  
158 variables owing to their violation of the assumptions inherent to the proportional hazards model.  
159 The main model was additionally adjusted for ethnicity (classified into White, Black, Asian,  
160 Others), TDI (continuous), assessment center (categorical), BMI (kg/m<sup>2</sup>; continuous), smoking  
161 status (categorized as never, previous, current), alcohol intake status (categorized as never,  
162 previous, current), and physical activity (classified as low, moderate, high). In addition to  
163 investigating the overall cancer, we also performed separate analyses for each site-specific cancer.  
164 The analysis of prostate cancer was restricted to the male sample, whereas the investigation of  
165 breast cancer, ovarian cancer, and uterine cancer was limited to the female sample. Furthermore,  
166 to adjust for additional possible confounding variables, we incorporated additional covariates  
167 into the analysis for certain cancer types (i.e., additionally adjusted models), guided by previous  
168 literature and biological plausibility [15]. More details can be found in Table S1.

169  
170 Our analysis treated the exposures of interest both in continuous (standardized to a mean of 0 and  
171 standard deviation of 1) and categorical (in quintiles) terms. When conducting trend tests, we  
172 used the median value of each quintile as a continuous variable within the models. Given 19  
173 distinct cancer subtypes, we adopted the False Discovery Rate (FDR) approach to address the  
174 issue of increasing false positives arising from multiple testing and reported the adjusted p-

175 values for simply adjusted models and main models. We did not perform multiple testing  
176 correction for the additionally adjusted models because they were for the purpose of sensitivity  
177 analysis and were only performed for 10 site-specific cancers with site-specific covariates. We  
178 also evaluated potential nonlinear dose-response using a semi-parametric approach through the  
179 utilization of restricted cubic splines [18] (4 knots were used in regression splines). We  
180 considered there was evidence supporting the presence of an association between a PUFA  
181 exposure and a cancer outcome if the continuous exposure analysis or the trend across quintiles  
182 analysis was statistically significant in the main models or in the additionally adjusted models, if  
183 applicable. In addition to the two above-described analyses, we assessed if there were any  
184 differences among the HRs across the five quintiles by applying likelihood ratio tests.

185  
186 In secondary analyses aiming at investigating potential variations in associations within distinct  
187 population subgroups, we replicated the aforementioned analyses for overall cancer while  
188 stratifying the data by the following factors: age (< vs.  $\geq$  the median age of 58 years), sex (male  
189 vs. female), TDI (< vs.  $\geq$  the population median of -2), BMI (< vs.  $\geq$  25), current smoking status  
190 (yes vs. no), current alcohol consumption status (yes vs. no) and level of physical activity (low  
191 and moderate vs. high). The exposures of interest (omega-6%, omega-3%, and their ratio) were  
192 categorized in quintiles. For each stratification variable, we conducted a likelihood ratio test to  
193 obtain the associated p-value for interaction. In the case of continuous stratification variables (i.e.,  
194 age, TDI, and BMI), we calculated interaction p-values based on a one-unit alteration of the  
195 respective stratification variables.

196  
197 Furthermore, we carried out a series of sensitivity analyses. First, to assess whether the  
198 association of plasma omega-6% with overall cancer risk would be altered by omega-3% or vice  
199 versa, we replicated the main analysis for overall cancer while involving both omega-6% and  
200 omega-3% as variables in the model. The correlation between omega-3% and omega-6% was  
201 assessed by the Pearson correlation. Second, to explore the effects of individual fatty acids, DHA  
202 and LA, on cancer incidence, we repeated the main analysis on DHA% and LA%. Third, to  
203 investigate the potential impact of reverse causation on the observed associations, individuals  
204 who experienced outcomes within the first year or the first three years of the follow-up period  
205 were excluded from the analysis. Last, to evaluate the representativeness of the study participants,

206 we conducted a comparative analysis of baseline characteristics between those individuals with  
207 exposure information and those without it. All p-values were assessed using a two-sided  
208 approach. Statistical significance was defined as a p-value less than 0.05 or a 95% confidence  
209 interval that did not include the value 1.0 for the corresponding HRs. We conducted all analyses  
210 using R (version: 4.0.3).

211

## 212 **Results**

### 213 *Baseline characteristics*

214 Within our analytical cohort of 253,138 participants, spanning an average follow-up period of  
215 12.9 years, a total of 29,838 individuals were diagnosed with cancer during follow-up. The  
216 baseline characteristics of all participants distributed across quintiles of plasma omega-6% and  
217 omega-3% were summarized in Table 1 and Table S2, respectively. On average, study  
218 participants were approximately 56 years old, with 90% of them identifying as White. Those in  
219 the higher quintiles of plasma omega-6% tended to be younger, female, with lower BMI and  
220 more physically active, and were less likely to smoke or drink alcohol.

### 221 *Associations of plasma omega-6, omega-3, and their ratio with cancer risk*

222 The findings for the associations of plasma omega-6% and omega-3% with the incidence of  
223 overall and site-specific cancer are shown in Figure 1, with more detailed information in Tables 2  
224 and 3. In the main models with continuous omega-6% and omega-3%, each standard deviation  
225 (SD) increase in the percentage was associated with a 2% (HR per SD = 0.98, 95% CI = 0.96-  
226 0.99,  $p < 0.01$ ) and 1% (HR per SD = 0.99, 95% CI = 0.97 - 1.00,  $p = 0.03$ ) decline in risk of  
227 overall cancer for omega-6% and omega-3%, respectively. Additionally, categorizing omega-6%  
228 and omega-3% into quintiles revealed that higher concentrations were linked to a decreased  
229 overall cancer risk, with a significant trend observed for both omega-6% and omega-3% ( $p_{\text{trend}} <$   
230 0.05).

231

232 We performed similar analyses for 19 site-specific cancers. In the main models with continuous  
233 exposure, omega-6% was inversely associated with the risk of 13 site-specific cancers (corrected  
234  $p < 0.05$ , Figure 1). If considering the trend across the quintiles in the main models, all but two  
235 site-specific cancers had inverse associations with omega-6%. The two exceptions were prostate



236 cancer and malignant neoplasms of lymphoid and hematopoietic tissues (corrected  $p_{\text{trend}} < 0.05$ ,  
237 Table 2). As for omega-3%, only five site-specific cancers had significant associations in the  
238 main analysis with continuous exposure (Figure 1), and the trend analysis across quintiles did not  
239 reveal additional significant associations (Table 3). Cancers at four sites, including stomach,  
240 colon, hepatobiliary tract, and lung, were inversely associated with both omega-6% and omega-  
241 3%. Only one site-specific cancer, prostate cancer, was associated with omega-3% (HR per SD =  
242 1.03, 95% CI = 1.01 - 1.05, corrected  $p = 0.049$ ) but not omega-6% (HR per SD = 1.01, 95% CI  
243 = 0.98 - 1.03, corrected  $p = 0.56$ ). In the sensitivity analysis of 10 site-specific cancers by  
244 additionally adjusting for site-specific covariates, most of the above-mentioned significant  
245 associations remained, except the associations of omega-6% with cancers at breast, uterus, and  
246 ovary (Figure 2). In summary, we counted associations that were statistically significant in the  
247 main models with either continuous exposure analysis or trend analysis, and that remain  
248 significant after adjusting for additional site-specific covariates when appropriate. There were 14  
249 site-specific cancers associated with omega-6% and five with omega-3%, with an overlap of four  
250 between these two groups. Only four site-specific cancers (i.e., ovary, breast, uterus, and  
251 lymphoid and hematopoietic tissues) were not associated with either omega-3% or omega-6%.

252  
253 We also conducted analysis of the omega-6/omega-3 ratio (Table S3, Figure S1). A higher  
254 omega-6/omega-3 ratio was associated with a higher overall cancer risk ( $p_{\text{trend}} = 0.038$ ). A total  
255 of three site-specific cancers showed evidence of positive associations with the ratio. Every SD  
256 increment in the ratio was associated with a 2% increase in the risk of rectum cancer, and the  
257 association remained unchanged after additionally controlling for site-specific covariates (per SD  
258 HR = 1.02, 95% CI = 1.01 - 1.03,  $p = 0.003$ ). When examining trends across quintiles, lung  
259 cancer was significant in the main model (corrected  $p_{\text{trend}} = 0.011$ ) and remained significant after  
260 adjusting for additional covariates ( $p_{\text{trend}} < 0.001$ ). Colon cancer was significant in the  
261 additionally adjusted model ( $p_{\text{trend}} = 0.015$ ).

262  
263 In addition to the trend analysis across quintiles, we assessed if there were any differences across  
264 the association effect sizes of quintiles by applying likelihood ratio tests. Most of the PUFAs-  
265 cancer relationships with significant trends were also statistically significant in the overall  
266 likelihood ratio tests. On the other hand, there were two pairs of relationships whose trend

267 analyses were not significant, but their overall tests were. The most notable pair was omega-6%  
268 and prostate cancer (additionally adjusted model,  $p_{\text{trend}} = 0.72$ ,  $p_{\text{overall}} = 0.005$ ). The association  
269 estimates across the quintiles support the presence of a nonlinear relationship: Quintile 2 (HR =  
270 1.10, 95% CI = 1.02 - 1.18), Quintile 3 (HR = 1.09, 95% CI = 1.01 - 1.17), Quintile 4 (HR =  
271 1.09, 95% = 1.00 - 1.17), and Quintile 5 (HR = 0.98, 95% CI = 0.90-1.06). The other pair was  
272 omega-6% and uterus cancer (additionally adjusted model,  $p_{\text{trend}} = 0.97$ ,  $p_{\text{overall}} = 0.022$ ), and  
273 there was an inverse association in the Quintile 5 (HR = 0.81, 95% CI = 0.66-0.99).

#### 274 *Stratified analyses for plasma omega-6 and omega-3 fatty acids*

275 Stratified analyses were conducted to assess potential effect modifications by age, sex, TDI, BMI,  
276 smoking status, alcohol consumption status, and physical activity, as shown in Table 4. The  
277 observed inverse associations of plasma omega-6% with overall cancer risk appeared to be  
278 notably more pronounced in the younger age group ( $p$  for interaction  $< 0.001$ ) and in females ( $p$   
279 for interaction = 0.006), with no apparent modification by the remaining potential stratification  
280 variables. Moreover, the estimated inverse associations of plasma omega-3% with overall cancer  
281 risk demonstrated a tendency to be stronger in the older group ( $p$  for interaction  $< 0.001$ ), in  
282 males ( $p$  for interaction = 0.002), and in current smokers ( $p$  for interaction = 0.017).

#### 283 *Restricted cubic spline analysis*

284 In the restricted cubic spline analysis, it is noteworthy that significant inverse associations were  
285 observed for omega-6% and omega-3% with the overall cancer incidence ( $p < 0.05$  for both  
286 variables, as shown in Figure S2). Moreover, potential nonlinearity was identified for the  
287 relationship between omega-3% and overall cancer incidence ( $p < 0.05$ ). This finding suggests  
288 that the protective effect of omega-3 PUFAs may exhibit enhanced efficacy at the lower  
289 concentration level. Due to the possible presence of a nonlinear association between omega-6%  
290 and prostate cancer, we further performed cubic spline analysis for prostate cancer. We found  
291 evidence of nonlinearity between omega-6% and prostate cancer, with the intermediate level of  
292 omega-6% associated with the highest risk ( $p = 0.02$ , Figure S3).

#### 293 *Sensitivity analyses*

294 In order to evaluate whether the associations between plasma omega-6% and overall cancer risk  
295 might undergo modification by omega-3%, or vice versa, both omega-6% and omega-3% were

296 simultaneously integrated into the same models (as detailed in Table S4 and Table S5). The  
297 correlation between plasma omega-6% and omega-3% was relatively low, with  $r = -0.12$  ( $p <$   
298  $0.01$ ). After their inclusion in the same models, the associations of both plasma omega-6% and  
299 omega-3% with overall cancer risk remained statistically significant. The results for DHA% and  
300 LA% were consistent with those for omega-3% and omega-6%, respectively (as detailed in Table  
301 S6 and Table S7). Additionally, when we excluded participants who experienced cancer or death  
302 within the first year or the first three years of follow-up, the outcomes remained unchanged (as  
303 detailed in Table S8 and Table S9). It is worth noting that the baseline characteristics were  
304 comparable between participants with and without exposure information, as evidenced by Table  
305 S10.

306

## 307 Discussion

308 Our population-based prospective cohort study in UK Biobank revealed that higher plasma  
309 omega-6% and omega-3% were both associated with a lower incidence of overall cancer. The  
310 overall association effect sizes in the main model were 2% and 1% reductions per SD of omega-  
311 6% and omega-3%, respectively. The association of omega-6% with cancer risk was independent  
312 of most risk factors examined, including TDI, BMI, smoking status, alcohol status, and physical  
313 activity. The observed inverse associations of plasma omega-6% appeared to be notably more  
314 pronounced in the younger age group and in women. On the other hand, the inverse associations  
315 of plasma omega-3% with overall cancer incidence were stronger in the older age group, in men,  
316 and in current smokers. The inverse associations of omega-6% and omega-3% with overall  
317 cancer incidence were robust to a list of sensitivity analyses. In terms of the incidence of 19 site-  
318 specific cancers, 14 were associated with omega-6% and five with omega-3%, all exhibiting  
319 inverse associations (3% - 7% reduced risk per SD of omega-6%; 5% - 8% reduced risk per SD  
320 of omega-3%), with the exception that prostate cancer was positively associated with omega-3%  
321 (3% increased risk). Only four site-specific cancers (i.e., ovary, breast, uterus, and lymphoid and  
322 hematopoietic tissues) were not associated with either omega-3% or omega-6%.

323

324 Despite a large number of studies, the links between PUFAs, especially omega-6 PUFAs, and the  
325 incidence of overall cancer remain ill-defined. Most existing studies examined dietary PUFAs or

326 supplements, instead of circulating biomarkers. A 2019 prospective cohort study found no  
327 significant associations of omega-3 or omega-6 PUFA intakes with the overall cancer incidence  
328 [19]. A 2020 meta-analysis of randomized trials showed that increasing dietary long-chain  
329 omega-3 PUFAs had little or no effects on overall cancer diagnosis or cancer death, while the  
330 effects of increasing dietary omega-6 PUFAs were unclear because the evidence was of very low  
331 quality [2]. A 2022 meta-analysis of observational studies revealed that fish intake and marine  
332 omega-3 PUFA intake were associated with lower mortality in patients with overall cancer [7].  
333 Of note, a 2020 meta-analysis of prospective studies showed that the blood level of omega-6  
334 PUFAs (highest vs. lowest category RR = 0.92, 95% CI = 0.86 - 0.98), but not their intake, was  
335 inversely associated with overall cancer risk [10]. They also found that the protective association  
336 was stronger in women than in men, consistent with our findings. In the context of UK Biobank,  
337 a 2021 prospective study demonstrated that regular fish oil supplementation was associated with  
338 a lower incidence of overall cancer, but only in participants who consumed fatty fish less than  
339 two times per week (HR = 0.96, 95% CI = 0.94 - 0.99), not in those who consumed more than  
340 twice per week (HR = 1.01, 95% CI = 0.95 - 1.07). Their subgroup analysis further unraveled  
341 that men were more likely to gain benefits from fish oil supplementation than women [15].  
342 Consistently, our study found that the plasma level of omega-3 PUFAs was inversely associated  
343 with overall cancer incidence and that the association was only significant in men. Moreover, a  
344 2023 study of circulating PUFAs and cancer mortality by our group revealed that both plasma  
345 omega-3 and omega-6 PUFAs were inversely associated with cancer mortality (highest vs.  
346 lowest quintile HR = 0.75, 95% = 0.65 - 0.87; HR = 0.80, 95% CI = 0.68 - 0.92; respectively)  
347 [17]. Overall, our findings provide support for possible small net protective roles of omega-3 and  
348 omega-6 PUFAs in the development of new cancer incidence. Our study also suggests that the  
349 usage of circulating blood biomarkers captures different aspects of dietary intake, reduces  
350 measurement errors, and thus enhances statistical power. The differential effects of omega-6%  
351 and omega-3% in age and sex subgroups warrant future investigation.

352  
353 In our study, we observed site-specific associations of omega-3 PUFAs with cancer incidence. A  
354 higher plasma level of omega-3 PUFAs was associated with a significant reduction in the  
355 incidence of digestive system cancers (including colon, stomach, and hepatobiliary tract) and  
356 lung cancer. However, it appeared to be linked to an increased risk of prostate cancer. The

357 observed protective associations between plasma omega-3 PUFAs and the incidence of digestive  
358 system cancers and lung cancer are consistent with recent studies of fish oil supplementation and  
359 dietary intake in UK Biobank [13-15]. Regular fish oil supplementation was associated with  
360 lower incidence of colon cancer (HR = 0.88, 95% CI = 0.8-0.98), hepatobiliary cancer (HR =  
361 0.72, 95% CI = 0.58-0.91), and lung cancer (HR = 0.87, 95% CI = 0.78-0.96) [15]. Another  
362 independent analysis of UK Biobank data revealed a 44% lower risk of liver cancer incidence  
363 among fish oil users [14]. Dietary intake of omega-3 PUFAs was associated with an 18%  
364 decreased risk in lung cancer incidence (HR=0.82, 95% CI= 0.73-0.93; per 1g/d) [13]. Notably,  
365 some studies and meta-analyses did not find significant associations of dietary omega-3 PUFAs  
366 and fish oil supplementation with colorectal cancer [3, 20, 21]. However, a recent meta-analysis  
367 showed that while the dietary intake of omega-3 PUFAs was not associated with the colorectal  
368 cancer risk (relative risk, RR = 0.97, 95% CI = 0.90 - 1.04 for the highest versus lowest  
369 category), the blood level of omega-3 PUFAs was associated with a lower risk (RR = 0.79, 95%  
370 CI = 0.64 - 0.98) [11]. Regarding prostate cancer, most studies did not find significant  
371 associations with dietary intake or blood level of omega-3 PUFAs [3, 15, 22-24]. However, the  
372 few statistically significant findings suggest that dietary intake of alpha-linolenic acid (ALA)  
373 was associated with a lower prostate cancer risk, while both dietary intake and blood level of  
374 DHA were associated with a higher risk [3, 23, 25]. Our study found that plasma omega-3% and  
375 DHA% were both positively associated with the risk of prostate cancer. Further studies are  
376 warranted to explore the roles of individual omega-3 PUFAs in the etiology of prostate cancer.

377  
378 In our investigation of omega-6 PUFAs, we observed inverse associations of plasma omega-6  
379 PUFAs with 14 site-specific cancers at head and neck, esophagus, stomach, colon, rectum,  
380 hepatobiliary tract, pancreas, lung, malignant melanoma, connective soft tissue, kidney, bladder,  
381 brain, and thyroid. Moreover, an increased omega-6/omega-3 PUFAs ratio was associated with  
382 elevated risks of rectum, colon, and lung cancer. Notably, the evidence on the associations  
383 between omega-6 PUFAs, the omega-6/omega-3 ratio, and site-specific cancers was limited and  
384 exhibited varying results. Two prospective cohort studies did not establish significant links  
385 between dietary omega-6 PUFAs and colorectal cancer [20, 21]. However, in agreement with our  
386 findings, another prospective cohort study observed that omega-6 PUFA intake was inversely  
387 associated with the risk of digestive cancer (including esophagus, liver, stomach, pancreas, and

388 colorectal) (highest vs. lowest quintile HR = 0.56, 95% CI = 0.32 - 0.97) or colorectal cancer  
389 alone (HR = 0.43, 95% CI = 0.22 - 0.83)(19). Also consistent with our results, a prospective  
390 cohort study based on UK Biobank indicated a modest protective effect of dietary omega-6  
391 PUFAs against lung cancer (HR = 0.98, 95% CI = 0.96-0.99; per 1g/d) [13]. A systematic review  
392 and meta-analysis of eight previous studies also found no apparent association between dietary  
393 omega-6 PUFAs and prostate cancer [23], in line with our findings from trend analysis.  
394 However, we did find evidence for the possible presence of a nonlinear relationship, with  
395 intermediate levels of omega-6% associated with the highest risk of prostate cancer. There were  
396 three site-specific cancers at breast, uterus, and ovary that were inversely associated with plasma  
397 omega-6% in our main models, but these associations disappeared after controlling for site-  
398 specific covariates, such as age of menarche, hormone replacement therapy use, oral  
399 contraceptive use, number of live births, menopausal status, and hysterectomy status. A previous  
400 meta-analysis of prospective studies did observe an inverse association of the blood omega-6  
401 level with breast cancer (highest vs. lowest category RR = 0.87; 95% CI: 0.77–0.98) [10]. Our  
402 study indicated that the consideration of site-specific covariates is critical in interpreting  
403 associations.

404  
405 This study has several strengths. The major strength was the prospective population-based study  
406 design in UK Biobank, which provides a large sample size, long duration of follow-up, and  
407 detailed information on potential confounding variables. We used the objective measurements of  
408 PUFA biomarkers in plasma instead of the estimated dietary intakes from self-reported  
409 questionnaires, which increases the accuracy of exposure assessment. Moreover, the cancer  
410 incidence data were acquired through cancer registries to reduce selection bias. This approach  
411 ensures a more representative sample, as these registries comprehensively cover a wide range of  
412 demographics and cancer types, and adhere to standardized data collection protocols, thereby  
413 enhancing the reliability and generalizability of our findings [26]. Furthermore, we adopted the  
414 FDR approach when investigating site-specific cancers, to address the issue of increasing false  
415 positives from multiple comparisons. In several sensitivity analyses, most of the associations  
416 remain materially unchanged, indicating the robustness of our results.

417

418 Some potential limitations warrant consideration in the interpretation of our findings. First,  
419 despite previous indications of the representativeness of UK Biobank in sociodemographic and  
420 health-related characteristics of the UK population, the potential for selective bias persists [27,  
421 28]. Notably, the participant sample skewed heavily toward European ancestry and White  
422 ethnicity, necessitating caution in generalizing results across diverse ancestral backgrounds and  
423 ethnicities. Secondly, while we adjusted for multiple potential confounding variables in our  
424 model, the inherent limitations of observational studies preclude the complete elimination of  
425 inaccuracies in measurements, unmeasured variables, and interdependencies among factors.  
426 Thirdly, the number of events was small for some specific cancer sites, which may lead to the  
427 limited statistical power of our study. Fourthly, our study focused on total omega-3 and omega-6  
428 PUFAs. There are only two individual PUFAs measured in the UK Biobank cohort, LA and DHA.  
429 We showed that the associations of LA% mirrored those of omega-6%, while DHA% mirrored  
430 omega-3%. Future studies into other individual PUFAs are needed. Lastly, despite the relative  
431 homogeneity of the sample, individual genetics have not been taken into account. Future studies  
432 are warranted to examine if specific genetic variants or composite genetic scores modify the  
433 associations of circulating PUFAs with overall or site-specific cancers.

434

## 435 **Conclusion**

436 In our UK Biobank prospective cohort study, elevated levels of plasma omega-6 and omega-3  
437 PUFAs were linked to reduced overall cancer risk, while a higher omega-6/omega-3 ratio was  
438 associated with increased risk. The associations of omega-6 PUFAs were stronger in the younger  
439 age group and in women, while the associations of omega-3 PUFAs were more prominent in the  
440 older group, in men, and in current smokers. Our findings extended to the inverse associations of  
441 plasma omega-6 and omega-3 PUFAs with 14 site-specific cancers. One notable exception to this  
442 trend of protective association was between omega-3 PUFAs and prostate cancer. Our study laid  
443 a solid foundation for future mechanistic studies into the roles of PUFAs in the etiology of  
444 various cancers. It also provided insights into the development of cancer prevention strategies by  
445 managing circulating PUFAs.

446

## 447 **Figure Legends**

448 **Figure 1.** Risk estimates of the incidence of overall cancer and 19 cancer sites for 1-SD increase  
449 of plasma omega-6% and omega-3%, for simply adjusted and main models. The results from  
450 simply adjusted models revealed the associations stratified by age and sex in the general cohort.  
451 The main models were adjusted for general covariates, including ethnicity (classified into White,  
452 Black, Asian, Others), Townsend deprivation index (continuous), assessment Center, BMI  
453 (kg/m<sup>2</sup>; continuous), smoking status (categorized as never, previous, current), alcohol intake  
454 status (categorized as never, previous, current), and physical activity (classified as low, moderate,  
455 high). P values were corrected for the multiple testing of 19 site-specific cancers.

456  
457 **Figure 2.** Risk estimates of the incidence of overall cancer and specific cancer sites for 1-SD  
458 increase of plasma omega-6% and omega-3%, for additionally adjusted models. For esophagus  
459 cancer, additionally adjusted for gastroesophageal reflux disease at baseline and waist-hip ratio.  
460 For colon cancer and rectum cancer, additionally adjusted for diabetes at baseline, aspirin use,  
461 processed meat intake, waist-hip ratio, and family history. For pancreas cancer, additionally  
462 adjusted for diabetes at baseline. For lung cancer, additionally adjusted for family history. For  
463 malignant melanoma cancer, additionally adjusted for skin color, ease of skin tanning, use of  
464 sun/UV protection, childhood sunburn occasions, frequency of solarium/sunlamp use. For breast  
465 cancer, restricted to female, and additionally adjusted for age when menarche started, hormone  
466 replacement therapy use, oral contraceptive use, number of live births, menopausal status,  
467 hysterectomy status, and family history. For uterus and ovary cancer, restricted to female, and  
468 additionally adjusted for age when menarche started, hormone replacement therapy use, oral  
469 contraceptive use, number of live births, menopausal status, hysterectomy status. For prostate  
470 cancer, restricted to male, and additionally adjusted for family history.

471

## 472 **Additional Information**

### 473 *Acknowledgements*

474 This research has been conducted using the UK Biobank Resource under Application Number  
475 48818. This work uses data provided by patients and collected by the NHS as part of their care  
476 and support. These data are copyrighted, 2022, NHS England. Reused with the permission of the  
477 NHS England and UK Biobank. All rights reserved. This research used data assets made



478 available by National Safe Haven as part of the Data and Connectivity National Core Study, led  
479 by Health Data Research UK in partnership with the Office for National Statistics and funded by  
480 UK Research and Innovation (grant ref MC\_PC\_20058). We would like to express our heartfelt  
481 gratitude to the UK Biobank participants and administrative staff.

#### 482 *Authors' contributions*

483 YZ performed data analysis, prepared visualizations, and wrote the original draft of the  
484 manuscript. YS and SS contributed to the data analysis. NKK and JTB contributed to the  
485 interpretations of results. YS (yeshen@uga.edu) and KY (kaixiong.ye@uga.edu) contributed  
486 equally to this project and should be considered co-corresponding authors. They jointly designed  
487 and supervised the project. All authors critically edited the manuscript for important intellectual  
488 content. The corresponding author (KY) attests that all listed authors meet the authorship criteria  
489 and that no others meeting the criteria were omitted.

#### 490 *Ethics approval and consent to participate*

491 The UK Biobank received ethical approval from the research ethics committee (reference ID: 11/  
492 NW/0382). Written informed consent was obtained from participants.

#### 493 *Consent for publication*

494 Not applicable.

#### 495 *Data availability*

496 The datasets analyzed during the current study are available from the UK Biobank through an  
497 application process ([www.ukbiobank.ac.uk/](http://www.ukbiobank.ac.uk/)).

#### 498 *Competing interests*

499 The authors declare no competing interests.

#### 500 *Funding information*

501 Research reported in this publication was supported by the National Institute of General Medical  
502 Sciences of the National Institute of Health under the award number R35GM143060 (KY). The  
503 content is solely the responsibility of the authors and does not necessarily represent the official  
504 views of the National Institutes of Health.

505



## 507 **References**

- 508 1. Vos T, Lim SS, Abbafati C, Abbas KM, Abbasi M, Abbasifard M, et al. Global burden of  
509 369 diseases and injuries in 204 countries and territories, 1990&#x2013;2019: a systematic  
510 analysis for the Global Burden of Disease Study 2019. *The Lancet*. 2020;396(10258):1204-22.
- 511 2. Hanson S, Thorpe G, Winstanley L, Abdelhamid AS, Hooper L, Abdelhamid A, et al.  
512 Omega-3, omega-6 and total dietary polyunsaturated fat on cancer incidence: systematic review  
513 and meta-analysis of randomised trials. *British Journal of Cancer*. 2020;122(8):1260-70.
- 514 3. Lee KH, Seong HJ, Kim G, Jeong GH, Kim JY, Park H, et al. Consumption of Fish and  
515  $\omega$ -3 Fatty Acids and Cancer Risk: An Umbrella Review of Meta-Analyses of Observational  
516 Studies. *Advances in Nutrition*. 2020;11(5):1134-49.
- 517 4. Shahidi F, Ambigaipalan P. Omega-3 Polyunsaturated Fatty Acids and Their Health  
518 Benefits. *Annu Rev Food Sci Technol*. 2018;9:345-81.
- 519 5. Gleissman H, Johnsen JI, Kogner P. Omega-3 fatty acids in cancer, the protectors of good  
520 and the killers of evil? *Exp Cell Res*. 2010;316(8):1365-73.
- 521 6. Diggie CP. In vitro studies on the relationship between polyunsaturated fatty acids and  
522 cancer: tumour or tissue specific effects? *Prog Lipid Res*. 2002;41(3):240-53.
- 523 7. Wang YP, Liu K-J, Long T, Long J, Li Y, Li J, Cheng L. Dietary fish and omega-3  
524 polyunsaturated fatty acids intake and cancer survival: A systematic review and meta-analysis.  
525 *Critical Reviews in Food Science and Nutrition*. 2022;63:6235 - 51.
- 526 8. Shim JS, Oh K, Kim HC. Dietary assessment methods in epidemiologic studies.  
527 *Epidemiol Health*. 2014;36:e2014009.
- 528 9. Hodson L, Skeaff CM, Fielding BA. Fatty acid composition of adipose tissue and blood  
529 in humans and its use as a biomarker of dietary intake. *Prog Lipid Res*. 2008;47(5):348-80.
- 530 10. Kim Y, Kim J. N-6 Polyunsaturated Fatty Acids and Risk of Cancer: Accumulating  
531 Evidence from Prospective Studies. *Nutrients*. 2020;12(9).
- 532 11. Kim Y, Kim J. Intake or Blood Levels of n-3 Polyunsaturated Fatty Acids and Risk of  
533 Colorectal Cancer: A Systematic Review and Meta-analysis of Prospective Studies. *Cancer*  
534 *Epidemiol Biomarkers Prev*. 2020;29(2):288-99.
- 535 12. Sudlow C, Gallacher J, Allen N, Beral V, Burton P, Danesh J, et al. UK biobank: an open  
536 access resource for identifying the causes of a wide range of complex diseases of middle and old  
537 age. *PLoS Med*. 2015;12(3):e1001779.

- 538 13. Chen T, Song L, Zhong X, Zhu Q, Huo J, Chen J, et al. Dietary polyunsaturated fatty  
539 acids intake, air pollution, and the risk of lung cancer: A prospective study in UK biobank.  
540 *Science of The Total Environment*. 2023;882:163552.
- 541 14. Jiang W, Li F-R, Yang H-H, Chen G-C, Hua Y-F. Relationship between fish oil use and  
542 incidence of primary liver cancer: findings from a population-based prospective cohort study.  
543 *Frontiers in Nutrition*. 2021;8:771984.
- 544 15. Liu Z, Luo Y, Ren J, Yang L, Li J, Wei Z, et al. Association between fish oil  
545 supplementation and cancer risk according to fatty fish consumption: A large prospective  
546 population-based cohort study using UK Biobank. *International Journal of Cancer*.  
547 2022;150(4):562-71.
- 548 16. Julkunen H, Cichońska A, Tiainen M, Koskela H, Nybo K, Mäkelä V, et al. Atlas of  
549 plasma NMR biomarkers for health and disease in 118,461 individuals from the UK Biobank.  
550 *Nature Communications*. 2023;14(1):604.
- 551 17. Zhang Y, Sun Y, Yu Q, Song S, Brenna JT, Shen Y, Ye K. Higher ratio of plasma omega-  
552 6/omega-3 fatty acids is associated with greater risk of all-cause, cancer, and cardiovascular  
553 mortality: a population-based cohort study in UK Biobank. *eLife Sciences Publications, Ltd*;  
554 2023.
- 555 18. Durrleman S, Simon R. Flexible regression models with cubic splines. *Stat Med*.  
556 1989;8(5):551-61.
- 557 19. Sellem L, Srour B, Guéraud F, Pierre FHF, Kesse-Guyot E, Fiolet T, et al. Saturated,  
558 mono- and polyunsaturated fatty acid intake and cancer risk: results from the French prospective  
559 cohort NutriNet-Santé. *European Journal of Nutrition*. 2019;58:1515-27.
- 560 20. Nguyen SM, Li H-L, Yu D, Cai H, Gao J, Gao Y-T, et al. Dietary fatty acids and  
561 colorectal cancer risk in men: A report from the Shanghai Men's Health Study and a  
562 meta-analysis. *International Journal of Cancer*. 2020;148:77 - 89.
- 563 21. Song M, Chan AT, Fuchs CS, Ogino S, Hu FB, Mozaffarian D, et al. Dietary intake of  
564 fish,  $\omega$ -3 and  $\omega$ -6 fatty acids and risk of colorectal cancer: A prospective study in U.S. men and  
565 women. *International Journal of Cancer*. 2014;135(10):2413-23.
- 566 22. Aucoin M, Cooley K, Knee C, Fritz H, Balneaves LG, Breau R, et al. Fish-Derived  
567 Omega-3 Fatty Acids and Prostate Cancer: A Systematic Review. *Integr Cancer Ther*.  
568 2017;16(1):32-62.

- 569 23. Chua ME, Sio MCD, Sorongon MC, Dy JS. Relationship of Dietary Intake of Omega-3  
570 and Omega-6 Fatty Acids with Risk of Prostate Cancer Development: A Meta-Analysis of  
571 Prospective Studies and Review of Literature. *Prostate Cancer*. 2012;2012:826254.
- 572 24. Farrell SW, DeFina LF, Tintle NL, Leonard D, Cooper KH, Barlow CE, et al. Association  
573 of the Omega-3 Index with Incident Prostate Cancer with Updated Meta-Analysis: The Cooper  
574 Center Longitudinal Study. *Nutrients*. 2021;13(2):384.
- 575 25. Fu Y-Q, Zheng J-S, Yang B, Li D. Effect of Individual Omega-3 Fatty Acids on the Risk  
576 of Prostate Cancer: A Systematic Review and Dose-Response Meta-Analysis of Prospective  
577 Cohort Studies. *Journal of Epidemiology*. 2015;25(4):261-74.
- 578 26. Allen NE, Lacey B, Lawlor DA, Pell JP, Gallacher J, Smeeth L, et al. Prospective study  
579 design and data analysis in UK Biobank. *Sci Transl Med*. 2024;16(729):eadf4428.
- 580 27. Batty GD, Gale CR, Kivimäki M, Deary IJ, Bell S. Comparison of risk factor  
581 associations in UK Biobank against representative, general population based studies with  
582 conventional response rates: prospective cohort study and individual participant meta-analysis.  
583 *Bmj*. 2020;368:m131.
- 584 28. Fry A, Littlejohns TJ, Sudlow C, Doherty N, Adamska L, Sprosen T, et al. Comparison of  
585 Sociodemographic and Health-Related Characteristics of UK Biobank Participants With Those  
586 of the General Population. *Am J Epidemiol*. 2017;186(9):1026-34.
- 587

*Plasma omega-6 PUFAs*

*Plasma omega-3 PUFAs*

| Cancer type                   | Events |  | HR (95% CI)      | P value |  | HR (95% CI)      | P value |
|-------------------------------|--------|--|------------------|---------|--|------------------|---------|
| <b>Overall</b>                |        |  |                  |         |  |                  |         |
| Simply adjusted model         | 29,838 |  | 0.94 (0.93-0.95) | <0.001  |  | 0.96 (0.95-0.97) | <0.001  |
| Main model                    | 23,628 |  | 0.98 (0.96-0.99) | 0.001   |  | 0.99 (0.97-1.00) | 0.033   |
| <b>Head and neck</b>          |        |  |                  |         |  |                  |         |
| Simply adjusted model         | 6,249  |  | 0.94 (0.91-0.96) | <0.001  |  | 0.95 (0.93-0.98) | <0.001  |
| Main model                    | 4,933  |  | 0.97 (0.94-1.00) | 0.061   |  | 0.97 (0.95-1.00) | 0.111   |
| <b>Esophagus</b>              |        |  |                  |         |  |                  |         |
| Simply adjusted model         | 3,217  |  | 0.89 (0.86-0.92) | <0.001  |  | 0.92 (0.88-0.95) | <0.001  |
| Main model                    | 2,506  |  | 0.93 (0.89-0.97) | <0.001  |  | 0.95 (0.92-1.00) | 0.076   |
| <b>Stomach</b>                |        |  |                  |         |  |                  |         |
| Simply adjusted model         | 3,024  |  | 0.92 (0.89-0.95) | <0.001  |  | 0.91 (0.87-0.94) | <0.001  |
| Main model                    | 2,375  |  | 0.96 (0.92-1.00) | 0.054   |  | 0.94 (0.90-0.98) | 0.019   |
| <b>Colon</b>                  |        |  |                  |         |  |                  |         |
| Simply adjusted model         | 4,586  |  | 0.91 (0.88-0.93) | <0.001  |  | 0.93 (0.90-0.96) | <0.001  |
| Main model                    | 3,634  |  | 0.94 (0.91-0.97) | <0.001  |  | 0.96 (0.92-0.99) | 0.048   |
| <b>Rectum</b>                 |        |  |                  |         |  |                  |         |
| Simply adjusted model         | 3,624  |  | 0.92 (0.89-0.95) | <0.001  |  | 0.94 (0.91-0.98) | 0.001   |
| Main model                    | 2,868  |  | 0.95 (0.91-0.99) | 0.022   |  | 0.97 (0.93-1.01) | 0.148   |
| <b>Hepatobiliary</b>          |        |  |                  |         |  |                  |         |
| Simply adjusted model         | 3,175  |  | 0.89 (0.86-0.92) | <0.001  |  | 0.90 (0.86-0.93) | <0.001  |
| Main model                    | 2,482  |  | 0.93 (0.89-0.97) | 0.005   |  | 0.93 (0.90-0.97) | 0.010   |
| <b>Pancreas</b>               |        |  |                  |         |  |                  |         |
| Simply adjusted model         | 3,286  |  | 0.90 (0.87-0.94) | <0.001  |  | 0.92 (0.89-0.96) | <0.001  |
| Main model                    | 2,576  |  | 0.95 (0.91-0.99) | 0.022   |  | 0.96 (0.92-1.00) | 0.076   |
| <b>Lung</b>                   |        |  |                  |         |  |                  |         |
| Simply adjusted model         | 4,741  |  | 0.86 (0.84-0.89) | <0.001  |  | 0.85 (0.82-0.88) | <0.001  |
| Main model                    | 3,642  |  | 0.93 (0.90-0.96) | <0.001  |  | 0.92 (0.89-0.96) | <0.001  |
| <b>Malignant melanoma</b>     |        |  |                  |         |  |                  |         |
| Simply adjusted model         | 4,016  |  | 0.93 (0.90-0.96) | <0.001  |  | 0.99 (0.96-1.02) | 0.389   |
| Main model                    | 3,172  |  | 0.95 (0.91-0.98) | 0.022   |  | 1.00 (0.97-1.04) | 0.933   |
| <b>Connective soft tissue</b> |        |  |                  |         |  |                  |         |
| Simply adjusted model         | 2,801  |  | 0.91 (0.88-0.95) | <0.001  |  | 0.92 (0.89-0.96) | <0.001  |
| Main model                    | 2,188  |  | 0.95 (0.90-0.99) | 0.025   |  | 0.95 (0.91-1.00) | 0.076   |
| <b>Breast</b>                 |        |  |                  |         |  |                  |         |
| Simply adjusted model         | 7,181  |  | 0.94 (0.91-0.96) | <0.001  |  | 0.95 (0.93-0.97) | <0.001  |
| Main model                    | 5,545  |  | 0.97 (0.94-1.00) | 0.061   |  | 0.97 (0.95-1.00) | 0.076   |
| <b>Uterus</b>                 |        |  |                  |         |  |                  |         |
| Simply adjusted model         | 3,445  |  | 0.89 (0.87-0.93) | <0.001  |  | 0.91 (0.88-0.94) | <0.001  |
| Main model                    | 2,672  |  | 0.96 (0.92-1.00) | 0.060   |  | 0.96 (0.92-0.99) | 0.076   |
| <b>Ovary</b>                  |        |  |                  |         |  |                  |         |
| Simply adjusted model         | 3,186  |  | 0.92 (0.89-0.95) | <0.001  |  | 0.93 (0.90-0.97) | <0.001  |
| Main model                    | 2,468  |  | 0.95 (0.91-0.99) | 0.025   |  | 0.96 (0.92-1.00) | 0.113   |
| <b>Prostate</b>               |        |  |                  |         |  |                  |         |
| Simply adjusted model         | 8,271  |  | 1.00 (0.98-1.02) | 0.802   |  | 1.02 (1.00-1.04) | 0.061   |
| Main model                    | 6,778  |  | 1.01 (0.98-1.03) | 0.558   |  | 1.03 (1.01-1.05) | 0.049   |
| <b>Kidney</b>                 |        |  |                  |         |  |                  |         |
| Simply adjusted model         | 3,376  |  | 0.90 (0.87-0.93) | <0.001  |  | 0.93 (0.90-0.97) | <0.001  |
| Main model                    | 2,635  |  | 0.95 (0.91-0.99) | 0.023   |  | 0.97 (0.93-1.01) | 0.140   |
| <b>Bladder</b>                |        |  |                  |         |  |                  |         |
| Simply adjusted model         | 3,263  |  | 0.91 (0.88-0.94) | <0.001  |  | 0.92 (0.89-0.95) | <0.001  |
| Main model                    | 2,572  |  | 0.95 (0.91-0.99) | 0.025   |  | 0.96 (0.92-1.00) | 0.076   |
| <b>Brain</b>                  |        |  |                  |         |  |                  |         |
| Simply adjusted model         | 3,075  |  | 0.92 (0.89-0.95) | <0.001  |  | 0.94 (0.91-0.98) | 0.001   |
| Main model                    | 2,403  |  | 0.95 (0.91-0.99) | 0.034   |  | 0.97 (0.93-1.02) | 0.221   |
| <b>Thyroid</b>                |        |  |                  |         |  |                  |         |
| Simply adjusted model         | 2,904  |  | 0.91 (0.88-0.95) | <0.001  |  | 0.93 (0.90-0.97) | <0.001  |
| Main model                    | 2,265  |  | 0.94 (0.90-0.99) | 0.023   |  | 0.97 (0.92-1.01) | 0.139   |
| <b>Lymphoma/Leukemia</b>      |        |  |                  |         |  |                  |         |
| Simply adjusted model         | 4,928  |  | 0.94 (0.92-0.97) | <0.001  |  | 0.95 (0.92-0.98) | <0.001  |
| Main model                    | 3,840  |  | 0.98 (0.95-1.01) | 0.205   |  | 0.97 (0.94-1.00) | 0.111   |

0.85 0.9 0.95 1 1.05

0.85 0.9 0.95 1 1.05

*Plasma omega-6 PUFAs*

*Plasma omega-3 PUFAs*

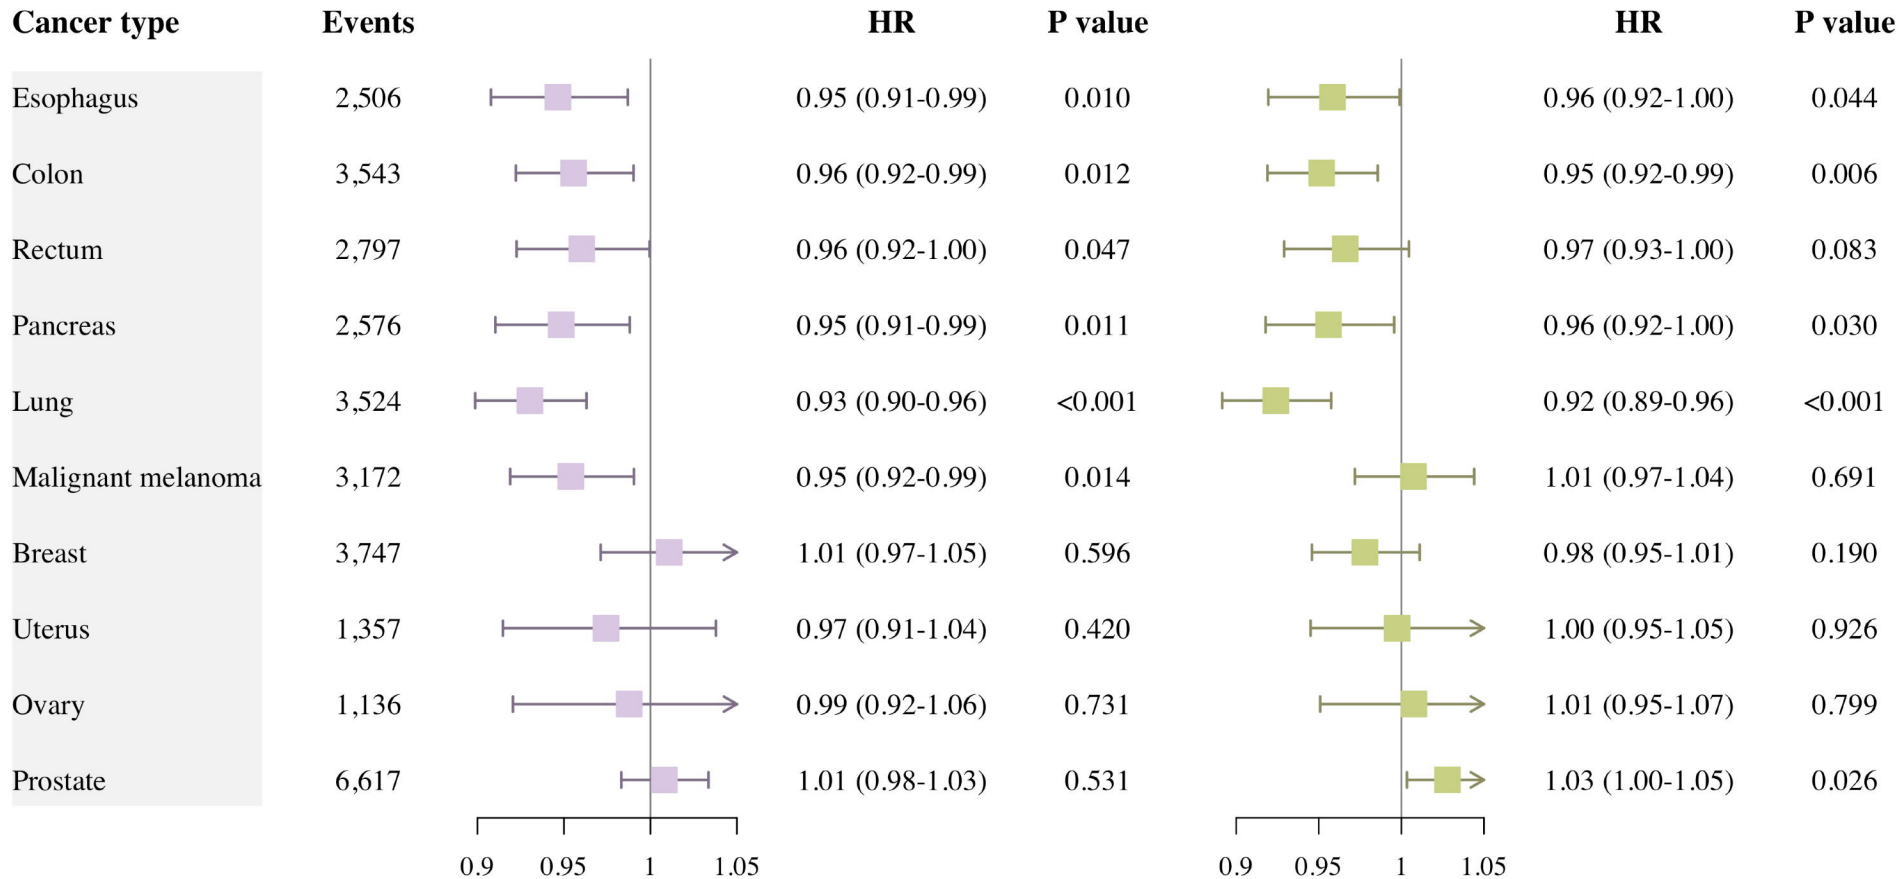

Table 1. Baseline characteristics of included participants by quintiles of the plasma omega-6% (n = 253,138)

| Characteristics <sup>a</sup>    | Omega-6% quintiles                |                                   |                                   |                                   |                                   | p-value             |
|---------------------------------|-----------------------------------|-----------------------------------|-----------------------------------|-----------------------------------|-----------------------------------|---------------------|
|                                 | 1 (median = 32.9)<br>(n = 50,628) | 2 (median = 36.4)<br>(n = 50,628) | 3 (median = 38.4)<br>(n = 50,628) | 4 (median = 40.0)<br>(n = 50,627) | 5 (median = 42.1)<br>(n = 50,627) |                     |
| <b>Age</b> (years)              | 57.6 (7.7)                        | 57.7 (7.8)                        | 57.1 (7.9)                        | 55.9 (8.1)                        | 53.6 (8.2)                        | <0.001 <sup>a</sup> |
| <b>Gender</b> (male%)           | 61.8                              | 49.8                              | 42.9                              | 39.6                              | 41.9                              | <0.001 <sup>b</sup> |
| <b>Ethnicity</b> (n%)           |                                   |                                   |                                   |                                   |                                   |                     |
| White                           | 46,982 (93.2%)                    | 46,868 (92.9%)                    | 46,597 (92.4%)                    | 45,918 (91.1%)                    | 43,857 (87.2%)                    | <0.001 <sup>b</sup> |
| Black                           | 196 (0.4%)                        | 229 (0.5%)                        | 237 (0.5%)                        | 256 (0.5%)                        | 459 (0.9%)                        |                     |
| Asian                           | 1,387 (2.8%)                      | 1,514 (3.0%)                      | 1,663 (3.3%)                      | 1,948 (3.9%)                      | 2,467 (4.9%)                      |                     |
| Others                          | 1,831 (3.6%)                      | 1,836 (3.6%)                      | 1,933 (3.8%)                      | 2,282 (4.5%)                      | 3,530 (7.0%)                      |                     |
| Missing (n)                     | 232                               | 181                               | 198                               | 223                               | 314                               |                     |
| <b>TDI</b>                      | -1.2 (3.2)                        | -1.4 (3.0)                        | -1.5 (3.0)                        | -1.5 (3.0)                        | -1.2 (3.2)                        | <0.001 <sup>a</sup> |
| Missing (n)                     | 55                                | 59                                | 63                                | 60                                | 74                                |                     |
| <b>BMI</b> (kg/m <sup>2</sup> ) | 29.8 (4.8)                        | 28.4 (4.8)                        | 27.3 (4.6)                        | 26.4 (4.3)                        | 25.4 (4.1)                        | <0.001 <sup>a</sup> |
| Missing (n)                     | 225                               | 192                               | 172                               | 153                               | 207                               |                     |
| <b>Smoking status</b> (n%)      |                                   |                                   |                                   |                                   |                                   | <0.001 <sup>b</sup> |
| Never                           | 22,714 (45.1%)                    | 26,033 (51.7%)                    | 27,887 (55.3%)                    | 29,650 (58.8%)                    | 32,321 (64.2%)                    |                     |
| Previous                        | 20,225 (40.2%)                    | 18,554 (36.8%)                    | 17,442 (34.6%)                    | 16,228 (32.2%)                    | 14,274 (28.3%)                    |                     |
| Current                         | 7,392 (14.7%)                     | 5,806 (11.5%)                     | 5,080 (10.1%)                     | 4,537 (9.0%)                      | 3,778 (7.5%)                      |                     |
| Missing (n)                     | 297                               | 235                               | 219                               | 212                               | 254                               |                     |
| <b>Alcohol status</b> (n%)      |                                   |                                   |                                   |                                   |                                   | <0.001 <sup>b</sup> |
| Never                           | 1,816 (3.6%)                      | 1,893 (3.7%)                      | 1,857 (3.7%)                      | 2,169 (4.3%)                      | 3,234 (6.4%)                      |                     |
| Previous                        | 1,896 (3.8%)                      | 1,665 (3.3%)                      | 1,615 (3.2%)                      | 1,636 (3.2%)                      | 2,085 (4.1%)                      |                     |
| Current                         | 46,786 (92.6%)                    | 46,957 (93.0%)                    | 47,063 (93.1%)                    | 46,722 (92.5%)                    | 45,139 (89.5%)                    |                     |
| Missing (n)                     | 130                               | 113                               | 93                                | 100                               | 169                               |                     |
| <b>Physical activity</b> (n%)   |                                   |                                   |                                   |                                   |                                   | <0.001 <sup>b</sup> |
| Low                             | 9,713 (23.9%)                     | 8,146 (20.1%)                     | 7,398 (18.2%)                     | 6,850 (16.7%)                     | 6,576 (15.8%)                     |                     |
| Moderate                        | 16,280 (40.1%)                    | 16,700 (41.1%)                    | 16,484 (40.5%)                    | 16,564 (40.4%)                    | 16,506 (39.7%)                    |                     |
| High                            | 14,630 (36.0%)                    | 15,739 (38.8%)                    | 16,798 (41.3%)                    | 17,614 (42.9%)                    | 18,522 (44.5%)                    |                     |
| Missing (n)                     | 10,005                            | 10,043                            | 9,948                             | 9,599                             | 9,023                             |                     |

Abbreviations: omega-6%, omega-6 fatty acids to total fatty acids percentage; TDI, Townsend deprivation index; BMI, body mass index.

<sup>a</sup> All variables measured at baseline are presented as mean (SD) unless otherwise specified.

<sup>b</sup> From the ANOVA test for continuous variables.

<sup>c</sup> From the Pearson's Chi-squared test for categorical variables.



Table 2. Associations of the plasma omega-6% with the incidence of overall cancer and 19 cancer sites in the UK Biobank

| Cancer Type                        | Per 1-SD            |        | Quintiles   |        |                     |        |                     |        |                     |       |                     |        | P for overall <sup>i</sup> | Adjusted P for overall <sup>j</sup> | P for trend <sup>k</sup> | Adjusted P for trend <sup>i</sup> |
|------------------------------------|---------------------|--------|-------------|--------|---------------------|--------|---------------------|--------|---------------------|-------|---------------------|--------|----------------------------|-------------------------------------|--------------------------|-----------------------------------|
|                                    | HR (95% CI)         | Events | 1           | 2      | 3                   | 4      | 5                   |        |                     |       |                     |        |                            |                                     |                          |                                   |
|                                    | HR (95% CI)         | Events | HR (95% CI) | Events | HR (95% CI)         | Events | HR (95% CI)         | Events |                     |       |                     |        |                            |                                     |                          |                                   |
| <b>Overall</b>                     |                     |        |             |        |                     |        |                     |        |                     |       |                     |        |                            |                                     |                          |                                   |
| Simply adjusted model              | 0.94<br>(0.93-0.95) | 6,787  | 1.00 (ref)  | 6,427  | 0.96<br>(0.93-0.99) | 6,118  | 0.94<br>(0.90-0.97) | 5,579  | 0.89<br>(0.86-0.92) | 4,927 | 0.84<br>(0.81-0.88) | <0.001 | --                         | <0.001                              | --                       |                                   |
| Main model                         | 0.98<br>(0.96-0.99) | 5,356  | 1.00 (ref)  | 5,064  | 0.99<br>(0.95-1.03) | 4,804  | 0.98<br>(0.94-1.02) | 4,420  | 0.95<br>(0.91-0.99) | 3,984 | 0.94<br>(0.90-0.98) | 0.018  | --                         | 0.002                               | --                       |                                   |
| <b>Head and neck</b>               |                     |        |             |        |                     |        |                     |        |                     |       |                     |        |                            |                                     |                          |                                   |
| Simply adjusted model              | 0.94<br>(0.91-0.96) | 1,344  | 1.00 (ref)  | 1,363  | 1.00<br>(0.93-1.08) | 1,297  | 0.96<br>(0.89-1.04) | 1,227  | 0.93<br>(0.86-1.00) | 1,018 | 0.81<br>(0.75-0.88) | <0.001 | <0.001                     | <0.001                              | <0.001                   |                                   |
| Main model                         | 0.97<br>(0.94-1.00) | 1,062  | 1.00 (ref)  | 1,066  | 1.02<br>(0.94-1.11) | 998    | 0.98<br>(0.89-1.07) | 971    | 0.98<br>(0.89-1.07) | 836   | 0.90<br>(0.81-0.99) | 0.099  | 0.111                      | 0.042                               | 0.046                    |                                   |
| <b>Esophagus</b>                   |                     |        |             |        |                     |        |                     |        |                     |       |                     |        |                            |                                     |                          |                                   |
| Simply adjusted model              | 0.89<br>(0.86-0.92) | 784    | 1.00 (ref)  | 743    | 0.97<br>(0.87-1.07) | 641    | 0.86<br>(0.78-0.96) | 608    | 0.86<br>(0.77-0.96) | 441   | 0.68<br>(0.61-0.77) | <0.001 | <0.001                     | <0.001                              | <0.001                   |                                   |
| Main model                         | 0.93<br>(0.89-0.97) | 619    | 1.00 (ref)  | 575    | 0.99<br>(0.88-1.11) | 491    | 0.90<br>(0.80-1.02) | 477    | 0.94<br>(0.83-1.06) | 344   | 0.75<br>(0.66-0.87) | 0.001  | 0.010                      | <0.001                              | 0.003                    |                                   |
| Additionally adjusted <sup>a</sup> | 0.95<br>(0.91-0.99) | 619    | 1.00 (ref)  | 575    | 1.01<br>(0.90-1.13) | 491    | 0.93<br>(0.82-1.05) | 477    | 0.98<br>(0.87-1.11) | 344   | 0.79<br>(0.69-0.91) | 0.006  | --                         | 0.009                               | --                       |                                   |
| <b>Stomach</b>                     |                     |        |             |        |                     |        |                     |        |                     |       |                     |        |                            |                                     |                          |                                   |
| Simply adjusted model              | 0.92<br>(0.89-0.95) | 703    | 1.00 (ref)  | 696    | 1.00<br>(0.90-1.11) | 608    | 0.90<br>(0.81-1.01) | 573    | 0.90<br>(0.80-1.00) | 444   | 0.76<br>(0.67-0.86) | <0.001 | <0.001                     | <0.001                              | <0.001                   |                                   |
| Main model                         | 0.96<br>(0.92-1.00) | 556    | 1.00 (ref)  | 545    | 1.04<br>(0.92-1.17) | 469    | 0.95<br>(0.83-1.07) | 450    | 0.97<br>(0.85-1.10) | 355   | 0.85<br>(0.73-0.98) | 0.057  | 0.068                      | 0.031                               | 0.037                    |                                   |
| <b>Colon</b>                       |                     |        |             |        |                     |        |                     |        |                     |       |                     |        |                            |                                     |                          |                                   |
| Simply adjusted model              | 0.91<br>(0.88-0.93) | 1,107  | 1.00 (ref)  | 1,016  | 0.92<br>(0.85-1.01) | 906    | 0.85<br>(0.78-0.93) | 866    | 0.85<br>(0.78-0.93) | 691   | 0.75<br>(0.68-0.83) | <0.001 | <0.001                     | 0.000                               | <0.001                   |                                   |
| Main model                         | 0.94<br>(0.91-0.97) | 890    | 1.00 (ref)  | 798    | 0.94<br>(0.85-1.04) | 709    | 0.88<br>(0.80-0.98) | 688    | 0.92<br>(0.83-1.02) | 549   | 0.81<br>(0.73-0.91) | 0.006  | 0.023                      | 0.001                               | 0.003                    |                                   |
| Additionally adjusted <sup>b</sup> | 0.96<br>(0.92-0.99) | 868    | 1.00 (ref)  | 773    | 0.95<br>(0.86-1.05) | 692    | 0.91<br>(0.82-1.01) | 670    | 0.95<br>(0.85-1.06) | 540   | 0.86<br>(0.76-0.97) | 0.105  | --                         | 0.018                               | --                       |                                   |
| <b>Rectum</b>                      |                     |        |             |        |                     |        |                     |        |                     |       |                     |        |                            |                                     |                          |                                   |
| Simply adjusted model              | 0.92<br>(0.89-0.95) | 864    | 1.00 (ref)  | 814    | 0.96<br>(0.88-1.06) | 727    | 0.89<br>(0.81-0.98) | 680    | 0.88<br>(0.79-0.97) | 539   | 0.75<br>(0.68-0.84) | <0.001 | <0.001                     | <0.001                              | <0.001                   |                                   |
| Main model                         | 0.95<br>(0.91-0.99) | 684    | 1.00 (ref)  | 642    | 0.99<br>(0.89-1.11) | 571    | 0.93<br>(0.83-1.04) | 534    | 0.92<br>(0.82-1.04) | 437   | 0.83<br>(0.73-0.94) | 0.034  | 0.053                      | 0.004                               | 0.015                    |                                   |
| Additionally adjusted <sup>b</sup> | 0.96<br>(0.92-1.00) | 667    | 1.00 (ref)  | 627    | 1.01<br>(0.90-1.13) | 555    | 0.94<br>(0.84-1.06) | 519    | 0.94<br>(0.84-1.06) | 429   | 0.86<br>(0.75-0.98) | 0.125  | --                         | 0.024                               | --                       |                                   |
| <b>Hepatobiliary</b>               |                     |        |             |        |                     |        |                     |        |                     |       |                     |        |                            |                                     |                          |                                   |
| Simply adjusted model              | 0.89<br>(0.86-0.92) | 775    | 1.00 (ref)  | 738    | 0.96<br>(0.87-1.07) | 637    | 0.86<br>(0.77-0.95) | 575    | 0.82<br>(0.73-0.91) | 450   | 0.70<br>(0.62-0.79) | <0.001 | <0.001                     | <0.001                              | <0.001                   |                                   |
| Main model                         | 0.93<br>(0.89-0.97) | 611    | 1.00 (ref)  | 580    | 1.01<br>(0.90-1.13) | 489    | 0.91<br>(0.80-1.02) | 445    | 0.89<br>(0.78-1.01) | 357   | 0.79<br>(0.69-0.91) | 0.003  | 0.019                      | <0.001                              | 0.003                    |                                   |
| <b>Pancreas</b>                    |                     |        |             |        |                     |        |                     |        |                     |       |                     |        |                            |                                     |                          |                                   |
| Simply adjusted model              | 0.90<br>(0.87-0.94) | 777    | 1.00 (ref)  | 748    | 0.97<br>(0.87-1.07) | 664    | 0.88<br>(0.79-0.98) | 631    | 0.88<br>(0.79-0.98) | 466   | 0.72<br>(0.64-0.81) | <0.001 | <0.001                     | <0.001                              | <0.001                   |                                   |
| Main model                         | 0.95<br>(0.91-0.99) | 613    | 1.00 (ref)  | 590    | 1.01<br>(0.90-1.13) | 511    | 0.92<br>(0.82-1.04) | 491    | 0.95<br>(0.84-1.08) | 371   | 0.81<br>(0.70-0.93) | 0.011  | 0.030                      | 0.005                               | 0.015                    |                                   |
| Additionally adjusted <sup>c</sup> | 0.95<br>(0.91-0.99) | 613    | 1.00 (ref)  | 590    | 1.02<br>(0.91-1.14) | 511    | 0.93<br>(0.82-1.05) | 491    | 0.96<br>(0.85-1.09) | 371   | 0.81<br>(0.71-0.93) | 0.012  | --                         | 0.007                               | --                       |                                   |

medRxiv preprint doi: <https://doi.org/10.1101/2024.01.21.24301568>; this version posted January 22, 2024. The copyright holder for this preprint (which was not certified by peer review) is the author/funder, who has granted medRxiv a license to display the preprint in perpetuity. It is made available under a [CC-BY-NC 4.0 International license](#).

**Lung**

|                                    |                     |       |            |       |                     |     |                     |     |                     |     |                     |        |        |        |        |
|------------------------------------|---------------------|-------|------------|-------|---------------------|-----|---------------------|-----|---------------------|-----|---------------------|--------|--------|--------|--------|
| Simply adjusted model              | 0.86<br>(0.84-0.89) | 1,241 | 1.00 (ref) | 1,066 | 0.86<br>(0.79-0.94) | 945 | 0.79<br>(0.72-0.86) | 856 | 0.75<br>(0.69-0.82) | 633 | 0.62<br>(0.56-0.69) | <0.001 | <0.001 | <0.001 | <0.001 |
| Main model                         | 0.93<br>(0.90-0.96) | 947   | 1.00 (ref) | 815   | 0.93<br>(0.84-1.02) | 715 | 0.87<br>(0.79-0.96) | 664 | 0.88<br>(0.79-0.97) | 501 | 0.76<br>(0.68-0.85) | <0.001 | <0.001 | <0.001 | <0.001 |
| Additionally adjusted <sup>d</sup> | 0.93<br>(0.90-0.96) | 912   | 1.00 (ref) | 788   | 0.93<br>(0.85-1.03) | 691 | 0.87<br>(0.78-0.96) | 647 | 0.88<br>(0.79-0.98) | 486 | 0.76<br>(0.68-0.86) | <0.001 | --     | <0.001 | --     |

**Malignant melanoma**

|                                    |                     |     |            |     |                     |     |                     |     |                     |     |                     |        |        |        |        |
|------------------------------------|---------------------|-----|------------|-----|---------------------|-----|---------------------|-----|---------------------|-----|---------------------|--------|--------|--------|--------|
| Simply adjusted model              | 0.93<br>(0.90-0.96) | 874 | 1.00 (ref) | 904 | 1.04<br>(0.94-1.14) | 849 | 1.00<br>(0.90-1.09) | 788 | 0.96<br>(0.87-1.06) | 601 | 0.78<br>(0.71-0.87) | <0.001 | <0.001 | <0.001 | <0.001 |
| Main model                         | 0.95<br>(0.91-0.98) | 695 | 1.00 (ref) | 710 | 1.05<br>(0.94-1.16) | 663 | 1.01<br>(0.91-1.13) | 615 | 0.98<br>(0.88-1.10) | 489 | 0.85<br>(0.75-0.96) | 0.008  | 0.025  | 0.021  | 0.033  |
| Additionally adjusted <sup>e</sup> | 0.95<br>(0.92-0.99) | 695 | 1.00 (ref) | 710 | 1.05<br>(0.94-1.17) | 663 | 1.02<br>(0.92-1.14) | 615 | 0.98<br>(0.88-1.10) | 489 | 0.86<br>(0.76-0.98) | 0.014  | --     | 0.043  | --     |

**Connective soft tissue**

|                       |                     |     |            |     |                     |     |                     |     |                     |     |                     |        |        |        |        |
|-----------------------|---------------------|-----|------------|-----|---------------------|-----|---------------------|-----|---------------------|-----|---------------------|--------|--------|--------|--------|
| Simply adjusted model | 0.91<br>(0.88-0.95) | 645 | 1.00 (ref) | 644 | 1.00<br>(0.90-1.12) | 569 | 0.91<br>(0.81-1.02) | 539 | 0.90<br>(0.80-1.01) | 404 | 0.74<br>(0.65-0.84) | <0.001 | <0.001 | <0.001 | <0.001 |
| Main model            | 0.95<br>(0.90-0.99) | 512 | 1.00 (ref) | 498 | 1.02<br>(0.90-1.15) | 438 | 0.94<br>(0.82-1.07) | 419 | 0.95<br>(0.83-1.09) | 321 | 0.81<br>(0.70-0.94) | 0.022  | 0.044  | 0.010  | 0.022  |

**Breast**

|                                    |                     |       |            |       |                     |       |                     |       |                     |       |                     |        |        |        |        |
|------------------------------------|---------------------|-------|------------|-------|---------------------|-------|---------------------|-------|---------------------|-------|---------------------|--------|--------|--------|--------|
| Simply adjusted model              | 0.94<br>(0.91-0.96) | 1,323 | 1.00 (ref) | 1,516 | 0.98<br>(0.91-1.06) | 1,555 | 0.94<br>(0.87-1.01) | 1,485 | 0.89<br>(0.82-0.96) | 1,302 | 0.84<br>(0.77-0.91) | <0.001 | <0.001 | <0.001 | <0.001 |
| Main model                         | 0.97<br>(0.94-1.00) | 1,025 | 1.00 (ref) | 1,153 | 0.99<br>(0.91-1.07) | 1,176 | 0.95<br>(0.88-1.04) | 1,149 | 0.93<br>(0.85-1.02) | 1,042 | 0.92<br>(0.83-1.01) | 0.292  | 0.308  | 0.032  | 0.037  |
| Additionally adjusted <sup>f</sup> | 1.01<br>(0.97-1.05) | 523   | 1.00 (ref) | 726   | 1.01<br>(0.91-1.14) | 836   | 1.02<br>(0.91-1.14) | 855   | 1.00<br>(0.89-1.12) | 807   | 1.01<br>(0.90-1.14) | 0.991  | --     | 0.927  | --     |

**Uterus**

|                                    |                     |     |            |     |                     |     |                     |     |                     |     |                     |        |        |        |        |
|------------------------------------|---------------------|-----|------------|-----|---------------------|-----|---------------------|-----|---------------------|-----|---------------------|--------|--------|--------|--------|
| Simply adjusted model              | 0.89<br>(0.87-0.93) | 772 | 1.00 (ref) | 788 | 0.97<br>(0.88-1.08) | 722 | 0.89<br>(0.80-0.98) | 673 | 0.86<br>(0.77-0.95) | 490 | 0.69<br>(0.61-0.77) | <0.001 | <0.001 | <0.001 | <0.001 |
| Main model                         | 0.96<br>(0.92-1.00) | 602 | 1.00 (ref) | 602 | 1.02<br>(0.91-1.14) | 557 | 0.98<br>(0.87-1.10) | 526 | 0.99<br>(0.88-1.12) | 385 | 0.82<br>(0.72-0.94) | 0.018  | 0.043  | 0.026  | 0.037  |
| Additionally adjusted <sup>g</sup> | 0.97<br>(0.91-1.04) | 220 | 1.00 (ref) | 286 | 1.00<br>(0.84-1.19) | 328 | 1.07<br>(0.90-1.26) | 314 | 1.00<br>(0.88-1.25) | 209 | 0.81<br>(0.66-0.99) | 0.022  | --     | 0.971  | --     |

**Ovary**

|                                    |                     |     |            |     |                     |     |                     |     |                     |     |                     |        |        |        |        |
|------------------------------------|---------------------|-----|------------|-----|---------------------|-----|---------------------|-----|---------------------|-----|---------------------|--------|--------|--------|--------|
| Simply adjusted model              | 0.92<br>(0.89-0.95) | 697 | 1.00 (ref) | 731 | 1.02<br>(0.92-1.13) | 647 | 0.90<br>(0.81-1.01) | 630 | 0.91<br>(0.82-1.02) | 481 | 0.77<br>(0.68-0.86) | <0.001 | <0.001 | <0.001 | <0.001 |
| Main model                         | 0.95<br>(0.91-0.99) | 552 | 1.00 (ref) | 558 | 1.02<br>(0.90-1.15) | 492 | 0.92<br>(0.81-1.04) | 489 | 0.96<br>(0.85-1.09) | 377 | 0.82<br>(0.72-0.95) | 0.023  | 0.044  | 0.011  | 0.022  |
| Additionally adjusted <sup>g</sup> | 0.99<br>(0.92-1.06) | 164 | 1.00 (ref) | 239 | 1.06<br>(0.87-1.29) | 263 | 1.06<br>(0.87-1.29) | 274 | 1.11<br>(0.91-1.35) | 196 | 0.89<br>(0.71-1.11) | 0.151  | --     | 0.554  | --     |

**Prostate**

|                                    |                     |       |            |       |                     |       |                     |       |                     |       |                     |       |       |       |       |
|------------------------------------|---------------------|-------|------------|-------|---------------------|-------|---------------------|-------|---------------------|-------|---------------------|-------|-------|-------|-------|
| Simply adjusted model              | 1.00<br>(0.98-1.02) | 1,962 | 1.00 (ref) | 1,853 | 1.08<br>(1.01-1.15) | 1,640 | 1.08<br>(1.01-1.15) | 1,532 | 1.09<br>(1.02-1.16) | 1,284 | 0.96<br>(0.90-1.03) | 0.001 | 0.001 | 0.902 | 0.902 |
| Main model                         | 1.01<br>(0.98-1.03) | 1,600 | 1.00 (ref) | 1,524 | 1.09<br>(1.02-1.17) | 1,347 | 1.08<br>(1.01-1.17) | 1,253 | 1.09<br>(1.01-1.17) | 1,054 | 0.97<br>(0.90-1.06) | 0.005 | 0.023 | 0.765 | 0.765 |
| Additionally adjusted <sup>h</sup> | 1.01<br>(0.98-1.03) | 1,555 | 1.00 (ref) | 1,488 | 1.10<br>(1.02-1.18) | 1,321 | 1.09<br>(1.01-1.17) | 1,219 | 1.09<br>(1.00-1.17) | 1,034 | 0.98<br>(0.90-1.06) | 0.005 | --    | 0.719 | --    |

**Kidney**

|                       |                     |     |            |     |                     |     |                     |     |                     |     |                     |        |        |        |        |
|-----------------------|---------------------|-----|------------|-----|---------------------|-----|---------------------|-----|---------------------|-----|---------------------|--------|--------|--------|--------|
| Simply adjusted model | 0.90<br>(0.87-0.93) | 813 | 1.00 (ref) | 758 | 0.95<br>(0.86-1.05) | 686 | 0.89<br>(0.80-0.98) | 636 | 0.86<br>(0.78-0.96) | 483 | 0.71<br>(0.64-0.80) | <0.001 | <0.001 | <0.001 | <0.001 |
| Main model            | 0.95<br>(0.91-0.99) | 638 | 1.00 (ref) | 591 | 0.99<br>(0.88-1.11) | 523 | 0.93<br>(0.83-1.05) | 495 | 0.95<br>(0.84-1.07) | 388 | 0.83<br>(0.72-0.95) | 0.051  | 0.065  | 0.011  | 0.022  |

**Bladder**

|                       |                     |     |            |     |                     |     |                     |     |                     |     |                     |        |        |        |        |
|-----------------------|---------------------|-----|------------|-----|---------------------|-----|---------------------|-----|---------------------|-----|---------------------|--------|--------|--------|--------|
| Simply adjusted model | 0.91<br>(0.88-0.94) | 781 | 1.00 (ref) | 746 | 0.98<br>(0.88-1.08) | 652 | 0.89<br>(0.80-0.99) | 623 | 0.90<br>(0.81-1.00) | 461 | 0.73<br>(0.65-0.82) | <0.001 | <0.001 | <0.001 | <0.001 |
| Main model            | 0.95<br>(0.91-0.99) | 613 | 1.00 (ref) | 586 | 1.02<br>(0.91-1.15) | 512 | 0.95<br>(0.85-1.08) | 489 | 0.98<br>(0.87-1.11) | 372 | 0.84<br>(0.73-0.96) | 0.040  | 0.054  | 0.028  | 0.037  |

**Brain**

|                       |                     |     |            |     |                     |     |                     |     |                     |     |                     |        |        |        |        |
|-----------------------|---------------------|-----|------------|-----|---------------------|-----|---------------------|-----|---------------------|-----|---------------------|--------|--------|--------|--------|
| Simply adjusted model | 0.92<br>(0.89-0.95) | 704 | 1.00 (ref) | 705 | 1.01<br>(0.91-1.12) | 621 | 0.92<br>(0.82-1.02) | 594 | 0.92<br>(0.82-1.02) | 451 | 0.76<br>(0.67-0.86) | <0.001 | <0.001 | <0.001 | <0.001 |
| Main model            | 0.95<br>(0.91-0.99) | 555 | 1.00 (ref) | 547 | 1.03<br>(0.91-1.16) | 481 | 0.95<br>(0.84-1.08) | 458 | 0.96<br>(0.84-1.09) | 362 | 0.83<br>(0.72-0.96) | 0.036  | 0.053  | 0.017  | 0.029  |

**Thyroid**

|                       |                     |     |            |     |                     |     |                     |     |                     |     |                     |        |        |        |        |
|-----------------------|---------------------|-----|------------|-----|---------------------|-----|---------------------|-----|---------------------|-----|---------------------|--------|--------|--------|--------|
| Simply adjusted model | 0.91<br>(0.88-0.95) | 668 | 1.00 (ref) | 653 | 0.97<br>(0.87-1.09) | 591 | 0.90<br>(0.80-1.01) | 561 | 0.89<br>(0.79-0.99) | 431 | 0.74<br>(0.65-0.84) | <0.001 | <0.001 | <0.001 | <0.001 |
| Main model            | 0.94<br>(0.90-0.99) | 529 | 1.00 (ref) | 506 | 0.99<br>(0.88-1.12) | 457 | 0.93<br>(0.82-1.06) | 434 | 0.93<br>(0.82-1.07) | 339 | 0.80<br>(0.69-0.93) | 0.026  | 0.045  | 0.006  | 0.015  |

**Lymphoid and Hematopoietic Tissues**

|                       |                     |       |            |       |                     |       |                     |     |                     |     |                     |       |       |        |        |
|-----------------------|---------------------|-------|------------|-------|---------------------|-------|---------------------|-----|---------------------|-----|---------------------|-------|-------|--------|--------|
| Simply adjusted model | 0.94<br>(0.88-0.97) | 1,113 | 1.00 (ref) | 1,105 | 1.01<br>(0.93-1.09) | 1,007 | 0.95<br>(0.87-1.03) | 916 | 0.91<br>(0.83-0.99) | 787 | 0.86<br>(0.78-0.94) | 0.003 | 0.003 | <0.001 | <0.001 |
| Main model            | 0.98<br>(0.95-1.01) | 873   | 1.00 (ref) | 854   | 1.03<br>(0.93-1.13) | 783   | 0.99<br>(0.90-1.10) | 717 | 0.97<br>(0.88-1.08) | 613 | 0.93<br>(0.83-1.03) | 0.446 | 0.446 | 0.174  | 0.183  |

Abbreviations: omega-6%, omega-6 fatty acids to total fatty acids percentage; SD, standard deviation; CI, confidence interval; HR, hazards ratio; ref, reference.

The results from simply adjusted models revealed the associations of plasma omega-6% with cancer risk stratified by age and sex in general cohort. The main models were adjusted for general covariates including ethnicity (classified into White, Black, Asian, Others), Townsend deprivation index (continuous), assessment Center, BMI (kg/m<sup>2</sup>; continuous), smoking status (categorized as never, previous, current), alcohol intake status (categorized as never, previous, current), and physical activity (classified as low, moderate, high). The additionally adjusted models were adjusted for extra covariates for some specific types of cancer.

<sup>a</sup> Additionally adjusted for gastroesophageal reflux disease at baseline and waist-hip ratio.

<sup>b</sup> Additionally adjusted for diabetes at baseline, aspirin use, processed meat intake, waist-hip ratio, and family history.

<sup>c</sup> Additionally adjusted for diabetes at baseline.

<sup>d</sup> Additionally adjusted for family history.

<sup>e</sup> Additionally adjusted for skin color, ease of skin tanning, use of sun/UV protection, childhood sunburn occasions, frequency of solarium/sunlamp use.

<sup>f</sup> Restricted to female, and additionally adjusted for age when menarche started, hormone replacement therapy use, oral contraceptive use, number of live births, menopausal status, hysterectomy status, and family history.

<sup>g</sup> Restricted to female, and additionally adjusted for age when menarche started, hormone replacement therapy use, oral contraceptive use, number of live births, menopausal status, hysterectomy status.

<sup>h</sup> Restricted to male, and additionally adjusted for family history.

<sup>i</sup> Used likelihood ratio test to compare the full model with reduced model.

<sup>j</sup> Based on False Discovery Rate (FDR) to calculate the adjusted p-values for simply adjusted models and main models among 19 cancer sites.

<sup>k</sup> Used the median value of each quintile as a continuous variable within the models.

Table 3. Associations of the plasma omega-3% with the incidence of overall cancer and 19 cancer sites in the UK Biobank

| Cancer Type                        | Per 1-SD         |        | Quintiles   |        |                  |        |                  |       |                  |       |                  | P for overall <sup>i</sup> | Adjusted P for overall <sup>j</sup> | P for trend <sup>k</sup> | Adjusted P for trend <sup>l</sup> |  |
|------------------------------------|------------------|--------|-------------|--------|------------------|--------|------------------|-------|------------------|-------|------------------|----------------------------|-------------------------------------|--------------------------|-----------------------------------|--|
|                                    | HR (95% CI)      | Events | 1           | 2      | 3                | 4      | 5                |       |                  |       |                  |                            |                                     |                          |                                   |  |
|                                    | HR (95% CI)      | Events | HR (95% CI) | Events | HR (95% CI)      | Events | HR (95% CI)      |       |                  |       |                  |                            |                                     |                          |                                   |  |
| <b>Overall</b>                     |                  |        |             |        |                  |        |                  |       |                  |       |                  |                            |                                     |                          |                                   |  |
| Simply adjusted model              | 0.96 (0.95-0.97) | 5,864  | 1.00 (ref)  | 5,837  | 0.95 (0.92-0.99) | 5,935  | 0.92 (0.89-0.96) | 6,086 | 0.91 (0.88-0.95) | 6,116 | 0.88 (0.85-0.91) | <0.001                     | --                                  | <0.001                   | --                                |  |
| Main model                         | 0.99 (0.97-1.00) | 4,546  | 1.00 (ref)  | 4,603  | 0.97 (0.93-1.01) | 4,688  | 0.95 (0.91-0.99) | 4,838 | 0.95 (0.91-0.99) | 4,953 | 0.95 (0.91-0.99) | 0.080                      | --                                  | 0.022                    | --                                |  |
| <b>Head and neck</b>               |                  |        |             |        |                  |        |                  |       |                  |       |                  |                            |                                     |                          |                                   |  |
| Simply adjusted model              | 0.95 (0.93-0.98) | 1,267  | 1.00 (ref)  | 1,185  | 0.89 (0.83-0.97) | 1,252  | 0.90 (0.84-0.98) | 1,275 | 0.89 (0.82-0.96) | 1,270 | 0.84 (0.78-0.91) | 0.001                      | 0.001                               | <0.001                   | <0.001                            |  |
| Main model                         | 0.97 (0.95-1.00) | 985    | 1.00 (ref)  | 928    | 0.91 (0.83-1.00) | 1,004  | 0.95 (0.87-1.04) | 988   | 0.91 (0.83-1.00) | 1,028 | 0.92 (0.84-1.01) | 0.205                      | 0.493                               | 0.150                    | 0.192                             |  |
| <b>Esophagus</b>                   |                  |        |             |        |                  |        |                  |       |                  |       |                  |                            |                                     |                          |                                   |  |
| Simply adjusted model              | 0.92 (0.88-0.95) | 685    | 1.00 (ref)  | 600    | 0.83 (0.75-0.93) | 664    | 0.87 (0.78-0.97) | 626   | 0.79 (0.71-0.88) | 642   | 0.77 (0.69-0.86) | <0.001                     | <0.001                              | <0.001                   | <0.001                            |  |
| Main model                         | 0.95 (0.92-1.00) | 510    | 1.00 (ref)  | 468    | 0.88 (0.78-1.00) | 523    | 0.95 (0.84-1.07) | 494   | 0.87 (0.77-0.99) | 511   | 0.88 (0.78-1.00) | 0.163                      | 0.493                               | 0.089                    | 0.188                             |  |
| Additionally adjusted <sup>a</sup> | 0.96 (0.92-1.00) | 510    | 1.00 (ref)  | 468    | 0.88 (0.78-1.00) | 523    | 0.95 (0.84-1.08) | 494   | 0.88 (0.77-0.99) | 511   | 0.89 (0.79-1.02) | 0.187                      | --                                  | 0.128                    | --                                |  |
| <b>Stomach</b>                     |                  |        |             |        |                  |        |                  |       |                  |       |                  |                            |                                     |                          |                                   |  |
| Simply adjusted model              | 0.91 (0.87-0.94) | 648    | 1.00 (ref)  | 561    | 0.82 (0.73-0.92) | 622    | 0.86 (0.77-0.96) | 603   | 0.80 (0.71-0.89) | 590   | 0.74 (0.66-0.83) | <0.001                     | <0.001                              | <0.001                   | <0.001                            |  |
| Main model                         | 0.94 (0.90-0.98) | 494    | 1.00 (ref)  | 442    | 0.86 (0.76-0.98) | 491    | 0.92 (0.81-1.04) | 476   | 0.86 (0.76-0.98) | 472   | 0.83 (0.73-0.95) | 0.051                      | 0.242                               | 0.015                    | 0.076                             |  |
| <b>Colon</b>                       |                  |        |             |        |                  |        |                  |       |                  |       |                  |                            |                                     |                          |                                   |  |
| Simply adjusted model              | 0.93 (0.90-0.96) | 952    | 1.00 (ref)  | 848    | 0.84 (0.77-0.92) | 938    | 0.88 (0.80-0.96) | 906   | 0.81 (0.74-0.89) | 942   | 0.79 (0.72-0.87) | <0.001                     | <0.001                              | <0.001                   | <0.001                            |  |
| Main model                         | 0.96 (0.92-0.99) | 727    | 1.00 (ref)  | 675    | 0.88 (0.79-0.98) | 759    | 0.94 (0.85-1.04) | 718   | 0.86 (0.77-0.95) | 755   | 0.87 (0.78-0.97) | 0.021                      | 0.152                               | 0.016                    | 0.076                             |  |
| Additionally adjusted <sup>b</sup> | 0.95 (0.92-0.99) | 710    | 1.00 (ref)  | 659    | 0.86 (0.78-0.96) | 735    | 0.91 (0.82-1.01) | 703   | 0.84 (0.75-0.93) | 736   | 0.85 (0.76-0.95) | 0.009                      | --                                  | 0.006                    | --                                |  |
| <b>Rectum</b>                      |                  |        |             |        |                  |        |                  |       |                  |       |                  |                            |                                     |                          |                                   |  |
| Simply adjusted model              | 0.94 (0.91-0.98) | 726    | 1.00 (ref)  | 676    | 0.89 (0.80-0.99) | 751    | 0.94 (0.85-1.04) | 744   | 0.90 (0.81-1.00) | 727   | 0.84 (0.76-0.93) | 0.017                      | 0.019                               | 0.003                    | 0.004                             |  |
| Main model                         | 0.97 (0.93-1.01) | 552    | 1.00 (ref)  | 536    | 0.93 (0.83-1.05) | 605    | 1.01 (0.90-1.14) | 591   | 0.97 (0.86-1.09) | 584   | 0.93 (0.82-1.05) | 0.494                      | 0.575                               | 0.343                    | 0.383                             |  |
| Additionally adjusted <sup>b</sup> | 0.97 (0.93-1.00) | 538    | 1.00 (ref)  | 524    | 0.92 (0.82-1.04) | 584    | 0.98 (0.87-1.10) | 580   | 0.95 (0.84-1.07) | 571   | 0.91 (0.80-1.03) | 0.475                      | --                                  | 0.198                    | --                                |  |
| <b>Hepatobiliary</b>               |                  |        |             |        |                  |        |                  |       |                  |       |                  |                            |                                     |                          |                                   |  |
| Simply adjusted model              | 0.90 (0.86-0.93) | 695    | 1.00 (ref)  | 593    | 0.81 (0.72-0.90) | 647    | 0.83 (0.75-0.93) | 619   | 0.76 (0.68-0.85) | 621   | 0.72 (0.65-0.81) | <0.001                     | <0.001                              | <0.001                   | <0.001                            |  |
| Main model                         | 0.93 (0.90-0.97) | 519    | 1.00 (ref)  | 470    | 0.87 (0.77-0.98) | 513    | 0.91 (0.80-1.03) | 488   | 0.84 (0.74-0.95) | 492   | 0.82 (0.72-0.94) | 0.024                      | 0.152                               | 0.005                    | 0.047                             |  |
| <b>Pancreas</b>                    |                  |        |             |        |                  |        |                  |       |                  |       |                  |                            |                                     |                          |                                   |  |
| Simply adjusted model              | 0.92 (0.89-0.96) | 671    | 1.00 (ref)  | 611    | 0.86 (0.77-0.96) | 665    | 0.88 (0.79-0.97) | 672   | 0.84 (0.75-0.94) | 667   | 0.78 (0.70-0.87) | <0.001                     | <0.001                              | <0.001                   | <0.001                            |  |
| Main model                         | 0.96 (0.92-1.00) | 507    | 1.00 (ref)  | 475    | 0.89 (0.79-1.01) | 528    | 0.95 (0.84-1.07) | 531   | 0.92 (0.81-1.04) | 535   | 0.89 (0.79-1.01) | 0.351                      | 0.493                               | 0.152                    | 0.192                             |  |
| Additionally adjusted <sup>c</sup> | 0.96 (0.92-1.00) | 507    | 1.00 (ref)  | 475    | 0.89 (0.79-1.01) | 528    | 0.94 (0.83-1.07) | 531   | 0.90 (0.81-1.03) | 535   | 0.89 (0.78-1.00) | 0.312                      | --                                  | 0.126                    | --                                |  |

medRxiv preprint doi: <https://doi.org/10.1101/2024.01.21.24301568>; this version posted January 22, 2024. The copyright holder for this preprint (which was not certified by peer review) is the author/funder, who has granted medRxiv a license to display the preprint in perpetuity. It is made available under a [CC-BY-NC 4.0 International license](#).

|                                    |                     |       |            |       |                     |       |                     |       |                     |       |                     |        |        |        |        |
|------------------------------------|---------------------|-------|------------|-------|---------------------|-------|---------------------|-------|---------------------|-------|---------------------|--------|--------|--------|--------|
| <b>Lung</b>                        |                     |       |            |       |                     |       |                     |       |                     |       |                     |        |        |        |        |
| Simply adjusted model              | 0.85<br>(0.82-0.88) | 1,067 | 1.00 (ref) | 941   | 0.82<br>(0.76-0.90) | 959   | 0.78<br>(0.72-0.86) | 904   | 0.70<br>(0.64-0.76) | 870   | 0.63<br>(0.57-0.69) | <0.001 | <0.001 | <0.001 | <0.001 |
| Main model                         | 0.92<br>(0.89-0.96) | 789   | 1.00 (ref) | 720   | 0.90<br>(0.82-1.00) | 744   | 0.92<br>(0.83-1.01) | 698   | 0.84<br>(0.76-0.93) | 691   | 0.81<br>(0.73-0.91) | 0.001  | 0.019  | <0.001 | 0.002  |
| Additionally adjusted <sup>d</sup> | 0.92<br>(0.89-0.96) | 759   | 1.00 (ref) | 695   | 0.90<br>(0.81-1.00) | 721   | 0.91<br>(0.82-1.01) | 676   | 0.83<br>(0.75-0.93) | 673   | 0.81<br>(0.73-0.91) | 0.001  | --     | <0.001 | --     |
| <b>Malignant melanoma</b>          |                     |       |            |       |                     |       |                     |       |                     |       |                     |        |        |        |        |
| Simply adjusted model              | 0.99<br>(0.96-1.02) | 768   | 1.00 (ref) | 735   | 0.91<br>(0.83-1.01) | 810   | 0.96<br>(0.87-1.06) | 846   | 0.97<br>(0.88-1.07) | 857   | 0.94<br>(0.85-1.03) | 0.477  | 0.477  | 0.467  | 0.467  |
| Main model                         | 1.00<br>(0.97-1.04) | 590   | 1.00 (ref) | 583   | 0.94<br>(0.84-1.06) | 650   | 1.00<br>(0.90-1.12) | 677   | 1.01<br>(0.90-1.13) | 672   | 0.97<br>(0.87-1.09) | 0.699  | 0.699  | 0.998  | 0.998  |
| Additionally adjusted <sup>e</sup> | 1.01<br>(0.97-1.04) | 590   | 1.00 (ref) | 583   | 0.94<br>(0.84-1.06) | 650   | 1.01<br>(0.90-1.13) | 677   | 1.02<br>(0.91-1.14) | 672   | 0.99<br>(0.88-1.11) | 0.686  | --     | 0.758  | --     |
| <b>Connective soft tissue</b>      |                     |       |            |       |                     |       |                     |       |                     |       |                     |        |        |        |        |
| Simply adjusted model              | 0.92<br>(0.89-0.96) | 581   | 1.00 (ref) | 517   | 0.84<br>(0.75-0.95) | 577   | 0.89<br>(0.79-1.00) | 565   | 0.83<br>(0.74-0.94) | 561   | 0.78<br>(0.70-0.88) | 0.001  | 0.001  | <0.001 | <0.001 |
| Main model                         | 0.95<br>(0.91-1.00) | 436   | 1.00 (ref) | 407   | 0.90<br>(0.78-1.03) | 456   | 0.96<br>(0.84-1.10) | 445   | 0.91<br>(0.80-1.04) | 444   | 0.88<br>(0.77-1.01) | 0.323  | 0.493  | 0.118  | 0.192  |
| <b>Breast</b>                      |                     |       |            |       |                     |       |                     |       |                     |       |                     |        |        |        |        |
| Simply adjusted model              | 0.95<br>(0.93-0.97) | 1,295 | 1.00 (ref) | 1,341 | 0.95<br>(0.88-1.02) | 1,405 | 0.92<br>(0.85-0.99) | 1,540 | 0.92<br>(0.85-0.99) | 1,600 | 0.87<br>(0.80-0.93) | 0.004  | 0.005  | <0.001 | <0.001 |
| Main model                         | 0.97<br>(0.95-1.00) | 965   | 1.00 (ref) | 1,048 | 0.99<br>(0.91-1.08) | 1,076 | 0.95<br>(0.87-1.04) | 1,194 | 0.96<br>(0.88-1.05) | 1,262 | 0.94<br>(0.86-1.02) | 0.545  | 0.575  | 0.118  | 0.192  |
| Additionally adjusted <sup>f</sup> | 0.98<br>(0.95-1.01) | 620   | 1.00 (ref) | 705   | 1.00<br>(0.90-1.12) | 677   | 0.89<br>(0.80-0.99) | 845   | 0.98<br>(0.88-1.09) | 900   | 0.93<br>(0.84-1.03) | 0.108  | --     | 0.194  | --     |
| <b>Uterus</b>                      |                     |       |            |       |                     |       |                     |       |                     |       |                     |        |        |        |        |
| Simply adjusted model              | 0.91<br>(0.88-0.94) | 678   | 1.00 (ref) | 647   | 0.89<br>(0.79-0.99) | 714   | 0.91<br>(0.82-1.01) | 710   | 0.84<br>(0.76-0.94) | 696   | 0.76<br>(0.68-0.85) | <0.001 | <0.001 | <0.001 | <0.001 |
| Main model                         | 0.96<br>(0.92-0.99) | 507   | 1.00 (ref) | 501   | 0.92<br>(0.82-1.05) | 552   | 0.96<br>(0.85-1.09) | 556   | 0.92<br>(0.82-1.04) | 556   | 0.89<br>(0.78-1.00) | 0.376  | 0.493  | 0.079  | 0.188  |
| Additionally adjusted <sup>g</sup> | 1.00<br>(0.95-1.05) | 210   | 1.00 (ref) | 234   | 0.97<br>(0.81-1.16) | 259   | 0.96<br>(0.80-1.15) | 323   | 1.05<br>(0.88-1.25) | 331   | 0.97<br>(0.82-1.16) | 0.817  | --     | 0.971  | --     |
| <b>Ovary</b>                       |                     |       |            |       |                     |       |                     |       |                     |       |                     |        |        |        |        |
| Simply adjusted model              | 0.93<br>(0.90-0.97) | 646   | 1.00 (ref) | 576   | 0.83<br>(0.74-0.93) | 631   | 0.85<br>(0.76-0.95) | 664   | 0.84<br>(0.75-0.94) | 669   | 0.79<br>(0.71-0.88) | 0.001  | 0.001  | <0.001 | <0.001 |
| Main model                         | 0.96<br>(0.92-1.00) | 485   | 1.00 (ref) | 452   | 0.88<br>(0.78-1.00) | 487   | 0.90<br>(0.80-1.02) | 519   | 0.91<br>(0.81-1.04) | 525   | 0.88<br>(0.77-1.00) | 0.287  | 0.493  | 0.147  | 0.192  |
| Additionally adjusted <sup>g</sup> | 1.01<br>(0.95-1.07) | 187   | 1.00 (ref) | 184   | 0.86<br>(0.70-1.05) | 193   | 0.80<br>(0.66-0.98) | 276   | 0.99<br>(0.82-1.19) | 296   | 0.92<br>(0.76-1.11) | 0.105  | --     | 0.888  | --     |
| <b>Prostate</b>                    |                     |       |            |       |                     |       |                     |       |                     |       |                     |        |        |        |        |
| Simply adjusted model              | 1.02<br>(1.00-1.04) | 1,605 | 1.00 (ref) | 1,637 | 1.01<br>(0.94-1.08) | 1,723 | 1.04<br>(0.97-1.12) | 1,635 | 1.02<br>(0.95-1.09) | 1,671 | 1.07<br>(1.00-1.14) | 0.337  | 0.356  | 0.065  | 0.069  |
| Main model                         | 1.03<br>(1.01-1.05) | 1,276 | 1.00 (ref) | 1,332 | 1.02<br>(0.94-1.10) | 1,419 | 1.06<br>(0.98-1.14) | 1,360 | 1.04<br>(0.96-1.12) | 1,391 | 1.08<br>(1.00-1.17) | 0.275  | 0.493  | 0.041  | 0.154  |
| Additionally adjusted <sup>h</sup> | 1.03<br>(1.00-1.05) | 1,239 | 1.00 (ref) | 1,302 | 1.02<br>(0.95-1.10) | 1,389 | 1.06<br>(0.98-1.15) | 1,331 | 1.04<br>(0.96-1.12) | 1,356 | 1.08<br>(1.00-1.17) | 0.346  | --     | 0.060  | --     |
| <b>Kidney</b>                      |                     |       |            |       |                     |       |                     |       |                     |       |                     |        |        |        |        |
| Simply adjusted model              | 0.93<br>(0.90-0.97) | 701   | 1.00 (ref) | 647   | 0.88<br>(0.79-0.98) | 680   | 0.88<br>(0.79-0.97) | 677   | 0.84<br>(0.75-0.93) | 671   | 0.79<br>(0.71-0.88) | 0.001  | 0.001  | <0.001 | <0.001 |
| Main model                         | 0.97<br>(0.93-1.01) | 527   | 1.00 (ref) | 512   | 0.93<br>(0.83-1.06) | 525   | 0.92<br>(0.82-1.04) | 532   | 0.91<br>(0.81-1.03) | 539   | 0.90<br>(0.80-1.02) | 0.526  | 0.575  | 0.133  | 0.192  |
| <b>Bladder</b>                     |                     |       |            |       |                     |       |                     |       |                     |       |                     |        |        |        |        |
| Simply adjusted model              | 0.92<br>(0.89-0.95) | 680   | 1.00 (ref) | 614   | 0.86<br>(0.77-0.95) | 663   | 0.87<br>(0.78-0.97) | 661   | 0.83<br>(0.75-0.93) | 645   | 0.77<br>(0.69-0.86) | <0.001 | <0.001 | <0.001 | <0.001 |
| Main model                         | 0.96<br>(0.92-1.00) | 518   | 1.00 (ref) | 482   | 0.89<br>(0.79-1.01) | 526   | 0.93<br>(0.83-1.06) | 526   | 0.91<br>(0.80-1.03) | 520   | 0.88<br>(0.77-0.99) | 0.269  | 0.493  | 0.080  | 0.188  |

|                                           | HR                  | N   | Ref        | N   | HR                  | N     | HR                  | N   | HR                  | N     | HR                  | N     | HR    | N      | HR     | N |
|-------------------------------------------|---------------------|-----|------------|-----|---------------------|-------|---------------------|-----|---------------------|-------|---------------------|-------|-------|--------|--------|---|
| <b>Brain</b>                              |                     |     |            |     |                     |       |                     |     |                     |       |                     |       |       |        |        |   |
| Simply adjusted model                     | 0.94<br>(0.91-0.98) | 634 | 1.00 (ref) | 560 | 0.84<br>(0.75-0.94) | 634   | 0.90<br>(0.81-1.01) | 621 | 0.85<br>(0.76-0.95) | 626   | 0.81<br>(0.72-0.91) | 0.003 | 0.004 | 0.001  | 0.002  |   |
| Main model                                | 0.97<br>(0.93-1.02) | 473 | 1.00 (ref) | 434 | 0.88<br>(0.77-1.01) | 506   | 0.99<br>(0.87-1.12) | 488 | 0.92<br>(0.81-1.05) | 502   | 0.92<br>(0.81-1.05) | 0.286 | 0.493 | 0.407  | 0.430  |   |
| <b>Thyroid</b>                            |                     |     |            |     |                     |       |                     |     |                     |       |                     |       |       |        |        |   |
| Simply adjusted model                     | 0.93<br>(0.90-0.97) | 593 | 1.00 (ref) | 534 | 0.85<br>(0.76-0.96) | 599   | 0.91<br>(0.81-1.01) | 585 | 0.84<br>(0.75-0.95) | 593   | 0.81<br>(0.72-0.91) | 0.005 | 0.006 | 0.001  | 0.002  |   |
| Main model                                | 0.97<br>(0.92-1.01) | 445 | 1.00 (ref) | 415 | 0.89<br>(0.78-1.02) | 473   | 0.98<br>(0.86-1.11) | 461 | 0.92<br>(0.80-1.05) | 471   | 0.91<br>(0.79-1.04) | 0.389 | 0.493 | 0.268  | 0.318  |   |
| <b>Lymphoid and Hematopoietic Tissues</b> |                     |     |            |     |                     |       |                     |     |                     |       |                     |       |       |        |        |   |
| Simply adjusted model                     | 0.95<br>(0.92-0.98) | 980 | 1.00 (ref) | 942 | 0.91<br>(0.83-1.00) | 1,009 | 0.92<br>(0.84-1.01) | 989 | 0.86<br>(0.79-0.94) | 1,008 | 0.83<br>(0.76-0.91) | 0.001 | 0.001 | <0.001 | <0.001 |   |
| Main model                                | 0.97<br>(0.94-1.00) | 747 | 1.00 (ref) | 725 | 0.92<br>(0.83-1.02) | 789   | 0.95<br>(0.86-1.06) | 782 | 0.91<br>(0.82-1.01) | 797   | 0.9<br>(0.81-0.99)  | 0.249 | 0.493 | 0.055  | 0.175  |   |

Abbreviations: omega-3%, omega-3 fatty acids to total fatty acids percentage; SD, standard deviation; CI, confidence interval; HR, hazards ratio; ref, reference.

The results from simply adjusted models revealed the associations of plasma omega-3% with cancer risk stratified by age and sex in general cohort. The main models were adjusted for general covariates including ethnicity (classified into White, Black, Asian, Others), Townsend deprivation index (continuous), assessment Center, BMI (kg/m<sup>2</sup>; continuous), smoking status (categorized as never, previous, current), alcohol intake status (categorized as never, previous, current), and physical activity (classified as low, moderate, high). The additionally adjusted models were adjusted for extra covariates for some specific types of cancer.

<sup>a</sup> Additionally adjusted for gastroesophageal reflux disease at baseline and waist-hip ratio.

<sup>b</sup> Additionally adjusted for diabetes at baseline, aspirin use, processed meat intake, waist-hip ratio, and family history.

<sup>c</sup> Additionally adjusted for diabetes at baseline.

<sup>d</sup> Additionally adjusted for family history.

<sup>e</sup> Additionally adjusted for skin color, ease of skin tanning, use of sun/UV protection, childhood sunburn occasions, frequency of solarium/sunlamp use.

<sup>f</sup> Restricted to female, and additionally adjusted for age when menarche started, hormone replacement therapy use, oral contraceptive use, number of live births, menopausal status, hysterectomy status, and family history.

<sup>g</sup> Restricted to female, and additionally adjusted for age when menarche started, hormone replacement therapy use, oral contraceptive use, number of live births, menopausal status, hysterectomy status.

<sup>h</sup> Restricted to male, and additionally adjusted for family history.

<sup>i</sup> Used likelihood ratio test to compare the full model with reduced model.

<sup>j</sup> Based on False Discovery Rate (FDR) to calculate the adjusted p-values for simply adjusted models and main models among 19 cancer sites.

<sup>k</sup> Used the median value of each quintile as a continuous variable within the models.

Table 4. Risk estimates<sup>a</sup> of plasma omega-6% and omega-3% with incidence of overall cancer, stratified by potential risk factors, in the UK Biobank Study (n = 253,138)

| Stratified variables   |     |        | Overall Cancer               |                                       |            |       |                  |       |                  |       |                  |       |                  |             |                               |
|------------------------|-----|--------|------------------------------|---------------------------------------|------------|-------|------------------|-------|------------------|-------|------------------|-------|------------------|-------------|-------------------------------|
|                        |     |        | Continuous P for interaction | Events & HR (95% CI) across quintiles |            |       |                  |       |                  |       |                  |       |                  | P for trend | Categorical P for interaction |
|                        |     |        | 1                            | 2                                     | 3          | 4     | 5                |       |                  |       |                  |       |                  |             |                               |
| Age, years             | ω-6 | < 58   | < 0.001                      | 1,873                                 | 1.00 (ref) | 1,718 | 0.94 (0.88-1.01) | 1,872 | 0.95 (0.88-1.02) | 2,026 | 0.90 (0.83-0.97) | 2,343 | 0.89 (0.83-0.96) | 0.001       | 0.093                         |
|                        |     | ≥ 58   |                              | 4,914                                 | 1.00 (ref) | 4,709 | 1.01 (0.96-1.06) | 4,246 | 0.99 (0.95-1.04) | 3,553 | 0.97 (0.92-1.02) | 2,584 | 0.92 (0.87-0.97) | 0.006       |                               |
|                        | ω-3 | < 58   | < 0.001                      | 2,474                                 | 1.00 (ref) | 2,243 | 1.01 (0.94-1.07) | 1,944 | 0.97 (0.91-1.04) | 1,732 | 1.01 (0.94-1.08) | 1,439 | 1.03 (0.96-1.11) | 0.421       | < 0.001                       |
|                        |     | ≥ 58   |                              | 3,390                                 | 1.00 (ref) | 3,594 | 0.95 (0.90-1.00) | 3,991 | 0.95 (0.90-1.00) | 4,354 | 0.95 (0.90-1.00) | 4,677 | 0.95 (0.90-1.00) | 0.106       |                               |
| Sex                    | ω-6 | Male   | --                           | 4,299                                 | 1.00 (ref) | 3,463 | 1.01 (0.96-1.06) | 2,930 | 1.01 (0.95-1.06) | 2,531 | 0.97 (0.91-1.02) | 2,304 | 0.94 (0.89-1.00) | 0.048       | 0.006                         |
|                        |     | Female |                              | 2,488                                 | 1.00 (ref) | 2,964 | 0.95 (0.89-1.01) | 3,188 | 0.94 (0.89-1.00) | 3,048 | 0.92 (0.87-0.98) | 2,623 | 0.91 (0.85-0.98) | 0.006       |                               |
|                        | ω-3 | Male   | --                           | 3,554                                 | 1.00 (ref) | 3,260 | 0.95 (0.90-1.00) | 3,175 | 0.95 (0.90-1.00) | 2,885 | 0.93 (0.88-0.98) | 2,653 | 0.94 (0.89-0.99) | 0.03        | 0.002                         |
|                        |     | Female |                              | 2,310                                 | 1.00 (ref) | 2,577 | 1.00 (0.94-1.07) | 2,760 | 0.96 (0.90-1.03) | 3,201 | 0.99 (0.93-1.05) | 3,463 | 0.97 (0.91-1.03) | 0.337       |                               |
| TDI                    | ω-6 | < -2   | 0.346                        | 3,381                                 | 1.00 (ref) | 3,461 | 1.01 (0.95-1.06) | 3,333 | 1.00 (0.95-1.06) | 3,026 | 0.96 (0.91-1.02) | 2,587 | 0.96 (0.90-1.02) | 0.101       | 0.732                         |
|                        |     | ≥ -2   |                              | 3,400                                 | 1.00 (ref) | 2,962 | 0.97 (0.92-1.03) | 2,780 | 0.96 (0.91-1.02) | 2,548 | 0.94 (0.89-1.00) | 2,333 | 0.91 (0.86-0.97) | 0.005       |                               |
|                        | ω-3 | < -2   | 0.030                        | 2,606                                 | 1.00 (ref) | 2,934 | 0.98 (0.93-1.04) | 3,185 | 0.96 (0.91-1.02) | 3,466 | 1.01 (0.95-1.07) | 3,597 | 0.99 (0.93-1.05) | 0.942       | 0.094                         |
|                        |     | ≥ -2   |                              | 3,251                                 | 1.00 (ref) | 2,894 | 0.95 (0.90-1.01) | 2,750 | 0.94 (0.88-0.99) | 2,613 | 0.89 (0.84-0.94) | 2,515 | 0.91 (0.86-0.97) | < 0.001     |                               |
| BMI, kg/m <sup>2</sup> | ω-6 | < 25   | 0.228                        | 838                                   | 1.00 (ref) | 1,381 | 0.95 (0.87-1.05) | 1,876 | 0.96 (0.88-1.06) | 2,190 | 0.93 (0.85-1.02) | 2,357 | 0.88 (0.81-0.96) | 0.003       | 0.446                         |
|                        |     | ≥ 25   |                              | 5,924                                 | 1.00 (ref) | 5,019 | 0.98 (0.94-1.03) | 4,213 | 0.97 (0.92-1.01) | 3,371 | 0.93 (0.88-0.97) | 2,558 | 0.94 (0.89-0.99) | 0.001       |                               |
|                        | ω-3 | < 25   | 0.756                        | 1,740                                 | 1.00 (ref) | 1,517 | 0.95 (0.88-1.03) | 1,588 | 0.95 (0.88-1.02) | 1,710 | 0.93 (0.86-1.01) | 2,087 | 0.91 (0.85-0.98) | 0.018       | 0.439                         |
|                        |     | ≥ 25   |                              | 4,107                                 | 1.00 (ref) | 4,301 | 0.98 (0.93-1.02) | 4,316 | 0.95 (0.90-1.00) | 4,355 | 0.96 (0.91-1.00) | 4,006 | 0.96 (0.91-1.01) | 0.105       |                               |
| Current smoking status | ω-6 | Yes    | --                           | 1,166                                 | 1.00 (ref) | 863   | 0.95 (0.86-1.05) | 764   | 0.96 (0.86-1.07) | 574   | 0.85 (0.76-0.96) | 471   | 0.95 (0.83-1.07) | 0.07        | 0.380                         |
|                        |     | No     |                              | 5,574                                 | 1.00 (ref) | 5,535 | 0.99 (0.95-1.03) | 5,327 | 0.98 (0.94-1.02) | 4,969 | 0.96 (0.92-1.00) | 4,430 | 0.93 (0.88-0.97) | 0.001       |                               |

|                               |                 |                 |       |            |            |                  |                  |                  |                  |                  |                  |                  |                  |         |       |       |
|-------------------------------|-----------------|-----------------|-------|------------|------------|------------------|------------------|------------------|------------------|------------------|------------------|------------------|------------------|---------|-------|-------|
| <b>Current alcohol status</b> | $\omega$ -3     | Yes             | --    | 1,311      | 1.00 (ref) | 902              | 0.90 (0.81-0.99) | 708              | 0.84 (0.76-0.94) | 536              | 0.84 (0.75-0.95) | 381              | 0.78 (0.69-0.89) | < 0.001 | 0.017 |       |
|                               |                 | No              |       | 4,520      | 1.00 (ref) | 4,902            | 0.99 (0.95-1.04) | 5,191            | 0.98 (0.93-1.02) | 5,518            | 0.98 (0.94-1.03) | 5,704            | 0.98 (0.94-1.03) | 0.48    |       |       |
|                               | $\omega$ -6     | Yes             | --    | 6,243      | 1.00 (ref) | 5,957            | 1.00 (0.96-1.04) | 5,676            | 0.99 (0.95-1.03) | 5,147            | 0.96 (0.92-1.00) | 4,398            | 0.94 (0.90-0.99) | 0.007   |       | 0.408 |
|                               |                 | No              |       | 529        | 1.00 (ref) | 459              | 0.90 (0.77-1.04) | 429              | 0.92 (0.79-1.07) | 418              | 0.87 (0.74-1.02) | 515              | 0.86 (0.74-1.01) | 0.055   |       |       |
| <b>Physical activity</b>      | $\omega$ -3     | Yes             | --    | 5,210      | 1.00 (ref) | 5,364            | 0.97 (0.93-1.01) | 5,499            | 0.95 (0.91-0.99) | 5,652            | 0.95 (0.91-0.99) | 5,696            | 0.95 (0.91-0.99) | 0.019   | 0.974 |       |
|                               |                 | No              |       | 638        | 1.00 (ref) | 462              | 0.97 (0.84-1.11) | 417              | 0.95 (0.82-1.10) | 426              | 0.95 (0.82-1.10) | 407              | 1.00 (0.86-1.16) | 0.93    |       |       |
|                               | $\omega$ -6     | Low or moderate | --    | 3,551      | 1.00 (ref) | 3,204            | 0.99 (0.95-1.04) | 2,888            | 0.98 (0.93-1.03) | 2,589            | 0.95 (0.90-1.00) | 2,290            | 0.93 (0.88-0.99) | 0.007   |       | 0.974 |
|                               |                 | High            |       | 1,875      | 1.00 (ref) | 1,909            | 0.98 (0.92-1.05) | 1,972            | 0.99 (0.93-1.06) | 1,882            | 0.96 (0.90-1.03) | 1,741            | 0.94 (0.88-1.01) | 0.089   |       |       |
| $\omega$ -3                   | Low or moderate | --              | 2,750 | 1.00 (ref) | 2,876      | 0.99 (0.94-1.04) | 2,893            | 0.96 (0.91-1.01) | 3,026            | 0.96 (0.91-1.01) | 2,977            | 0.96 (0.91-1.01) | 0.099            | 0.844   |       |       |
|                               | High            |                 | 1,848 | 1.00 (ref) | 1,780      | 0.94 (0.88-1.00) | 1,848            | 0.94 (0.88-1.00) | 1,870            | 0.94 (0.88-1.00) | 2,033            | 0.93 (0.87-1.00) | 0.089            |         |       |       |

Abbreviations: omega-6%, omega-6 fatty acids to total fatty acids percentage; omega-3%, omega-3 fatty acids to total fatty acids percentage; CI, confidence interval; HR, hazards ratio; ref, reference.

<sup>a</sup> From Cox proportional hazards regression; results were based on the main models, stratified by age and sex, and adjusted for ethnicity (classified into White, Black, Asian, Others), Townsend deprivation index (continuous), assessment Center, BMI (kg/m<sup>2</sup>; continuous), smoking status (categorized as never, previous, current), alcohol intake status (categorized as never, previous, current), and physical activity (classified as low, moderate, high).
